# Multiple congenital malformations arise from somatic mosaicism for constitutively active *Pik3ca* signaling

Elise Marechal<sup>1</sup>, Anne Poliard<sup>2</sup>, Kilian Henry<sup>2</sup>, Mathias Moreno<sup>1</sup>, Mathilde Legrix<sup>1</sup>, Nicolas Macagno<sup>1</sup>, Grégoire Mondielli<sup>1</sup>, Teddy Fauquier<sup>1</sup>, Anne Barlier<sup>1,3</sup>, Heather C. Etchevers<sup>4\*</sup>

<sup>1</sup> Aix Marseille Univ, INSERM, MMG, U1251, MarMaRa Institute, Marseille, France

<sup>2</sup> URP 2496 Orofacial Pathologies, Imagery, and Biotherapies, CNRS, GDR 2031 CREST-NET, School of Dentistry, Université Paris Cité, Montrouge, France

<sup>3</sup> AP-HM, MMG, MarMaRa Institute, La Conception Hospital Laboratory of Molecular Biology, Marseille, France

<sup>4</sup> Aix Marseille Univ, INSERM, MMG, U1251, CNRS, GDR 2031 CREST-NET, MarMaRa Institute, Marseille, France

## \* Correspondence:

Heather C. Etchevers

[heather.etchevers@inserm.fr](mailto:heather.etchevers@inserm.fr) ORCID: 0000-0003-0201-3799

**Keywords:** neural crest, embryo, PI3K, cancer, birth defect, cleft palate, vascular anomaly

## Abstract

Recurrent missense mutations of the *PIK3CA* oncogene are among the most frequent drivers of human cancers. These often lead to constitutive activation of its product p110 $\alpha$ , a phosphatidylinositol 3-kinase (PI3K) catalytic subunit. In addition to causing a range of rare and common cancers, the H1047R mutation is also found in affected tissues of a distinct set of congenital tumours and malformations. Collectively termed *PIK3CA*-related disorders (PRDs), these lead to overgrowth of skin, brain, adipose, connective, musculoskeletal tissues and/or blood and lymphatic vessel components. Vascular malformations are frequently observed in PRD due to cell-autonomous activation of the PI3K signaling pathway within endothelial cells. These, like most muscle, connective tissue and bone, are derived from the embryonic mesoderm. However, important organ systems affected in PRDs are neuroectodermal derivatives. To further examine their development, we drove the most common post-zygotic activating mutation of *Pik3ca* in neural crest and related embryonic lineages. Effects in cells having once expressed Wnt1, including the brain roofplate and most neural crest, were most dramatic in the head. Outcomes included macrocephaly, cleft secondary palate and more subtle skull anomalies. Surprisingly, *Pik3ca*-mutant subpopulations of neural crest origin were also associated with widespread cephalic vascular anomalies. Mesectodermal neural crest is a major source of vascular mural cells in the head but not the body. To examine the potential of non-mesectodermal neural crest, we turned to other Cre drivers, leading us to incidentally discover previously undescribed lineages that had expressed the transcription factor Egr2 (Krox20) and that may be co-opted in pathogenesis. In particular, Schwann cell precursors having transcribed either Krox20 or Sox10 and expressing constitutively active PI3K also gave rise to adult-onset vascular tumors and cancers, including melanoma. These murine phenotypes may aid discovery of new candidate human PRDs affecting craniofacial and vascular smooth muscle development as well as the reciprocal paracrine signaling mechanisms leading to tissue overgrowth.

## 1 Introduction

Inappropriate activation of signaling components between the cell membrane and its nucleus leads to pathologies with onset at any stage of life, ranging from before birth into old age. These include most cancers, but also numerous, individually rare diseases with a congenital basis.

Nearly two dozen phenotypically disparate overgrowth disorders are mosaic for gene mutations that constitutively activate the phosphatidylinositol 3-kinase (PI3K) pathway (Canaud et al., 2021). A striking majority of these diseases show the same hotspot, activating mutations in the *PIK3CA* gene as over one in eight cancers in the U.S. (Mendiratta et al., 2021). A large subset of *PIK3CA*-related disorders (PRDs) is also known as “*PIK3CA*-related overgrowth syndromes” or PROS, where susceptible tissues such as the cortex (Alcantara et al., 2017), skeletal muscles (Frisk et al., 2019) or the face (Couto et al., 2017) develop segmental overgrowth. Because the mutations are usually somatic, the induced overgrowth can be massive and sometimes, life-threatening.

Normally, receptor tyrosine kinase-mediated recruitment and activation of PI3Ks lead to appropriate production of second messengers from lipid substrates. PI3Ks consist of a regulatory p85 subunit and one of three possible 110-kDa catalytic subunits (p110 $\alpha$ , p110 $\beta$ , p110 $\delta$ ). *PIK3CA* encodes p110 $\alpha$ . Distinct combinations of 3-phosphoinositide substrates produced by PI3Ks and the three AKT protein isoform effectors mediate metabolic, trafficking, growth, survival, proliferation and motility processes to coordinate cellular responses with other signaling pathways.

How imbalanced PI3K signaling affects normal homeostasis to cause relatively unchecked cell proliferation before birth but cancer later in life is not understood. One clue may lie in the recent discovery that in an inducible mouse PRD model, penetrance and severity of retinal venous and/or capillary malformations correlated with the process of active angiogenesis (Kobialka et al., 2022). Lesions arose as a function of exposure to normal, age-dependent local growth factor stimuli, rather than of the extent of mosaicism. As seen in human PRD vascular malformations, mosaicism for constitutively active *Pik3ca* entailed the permanent loss of pericytic coverage, while both endothelial proliferation and pericyte loss could be reversed in this model upon administration of an Akt inhibitor (Kobialka et al., 2022).

Neural crest (NC) cells are the source of pericytes and vascular smooth muscle in the branchial sector of the face, neck, heart and forebrain, which includes the eyes (Etchevers et al., 2001). Towards the end of the first month of human gestation, NC cells migrate away from the dorsal aspect of the future brain and spinal cord to engender a wide variety of differentiated cell types (Le Douarin and Kalcheim, 1999). Their dispersion throughout the embryonic head and body brings them in contact with many distinct and changing microenvironments. Errors in NC differentiation and function lead to a large class of diseases collectively known as neurocristopathies (Bolande, 1974; Etchevers et al., 2019). The normal potential of NC stem cells to both influence surrounding tissues and differentiate according to context means this population is a prime target for growth factor receptor signaling anomalies (Le Lievre and Le Douarin, 1975; Bergwerff et al., 1998; Etchevers et al., 1999, 2001; Müller et al., 2008; Zachariah and Cyster, 2010).

NC specification, migration and differentiation are dependent on PI3K signaling, as shown by loss-of-function studies (Ciarlo et al., 2017; Sittewelle and Monsoro-Burq, 2018). Here, we describe new tools to test the hypothesis that gain-of-function *Pik3ca* mutations in vasculogenic lineages outside of the endothelium proper can also cause vascular malformation syndromes. Our findings both model and extend the PRD spectrum to include effects on the craniofacial skeleton.

## New models of *Pik3ca*-related disorders

## 2 Materials and Methods

### 2.1 Mouse lines

All mice were obtained directly or through Charles River France from the Jackson Laboratories (Bar Harbor, ME, USA) and intentionally outbred over multiple generations to CD-1/Swiss mice purchased from Janvier Laboratories in order to phenocopy human genetic heterogeneity. Knock-in lines included conditional, floxed *Pik3ca*<sup>H1047R</sup> (RRID:IMSR\_JAX:016977) (Adams et al., 2011) or *RdTomato* reporter mice (RRID:IMSR\_JAX:007909); transgenics included the *Wnt1-Cre* (RRID:IMSR\_JAX:003829), *Krox20-Cre* (RRID:IMSR\_JAX:025744) and tamoxifen-inducible *Sox10-CreER<sup>T2</sup>* (RRID:IMSR\_JAX:027651) lines. 4-hydroxy-tamoxifen was solubilized in 10% ethanol, emulsified in 90% corn oil and administered in a single intraperitoneal injection of 0.1 mL at 10 mg/mL. All mice were housed in individual, ventilated cages with 12-hr light/dark cycles with food and water *ad libitum*.

Mice were genotyped with 50 ng DNA purified from ear punch or tail clips using the primers described in the original reports and Phire Tissue Direct PCR Master Mix (Thermo Scientific) according to manufacturer's recommendations.

### 2.2 Ethics approval

The animal study was reviewed and approved by the French national animal care and use committee (ACUC) C2EA-14 under the reference 9522-2017040517496865v5.

### 2.3 Histology, immunofluorescence and *in situ* hybridization

Embryos were staged taking embryonic day (E) 0.5 as the morning of the vaginal plug. Tissue biopsies were kept in ice-cold phosphate-buffered saline (PBS) until dissection, fixed in freshly thawed, neutral pH-buffered 4% paraformaldehyde for 20 minutes to overnight depending on tissue size, and rinsed again in PBS. Paraffin blocks were prepared according to standard embedding protocols, sections cut on a Leica microtome at 7  $\mu$ m, and deparaffinated and rehydrated to PBS through xylene and decreasing ethanol solutions. Alternatively, fluorescent tissues were equilibrated in 15% then 30% sucrose in PBS and positioned in liquid embedding compound (Leica) before snap-freezing in plastic molds over liquid nitrogen. Cryosections were cut at 12  $\mu$ m onto Superfrost Plus slides, dried, washed in PBS. All immunofluorescent sections were immersed for 20 minutes in 50 mM glycine, 0.1 M ammonium chloride before pre-incubating in a blocking solution of 0.1% Tween-20, 2% fetal calf serum in PBS and diluting the primary antibodies at the indicated concentrations for overnight treatment under Parafilm coverslips at 4°C. Standard procedures were followed for DAPI counterstain, subsequent Alexa Fluor-coupled secondary antibody (ThermoFisher) incubation and mounting with Fluoromount G (SouthernBiotech) under coverslips.

The following primary antibodies were used in this study: rat anti-Pecam1/CD31 (ThermoFisher, RRID:AB\_467201), mouse anti-alpha-smooth muscle actin (Sigma-Aldrich, RRID:AB\_10979529), rabbit anti-phosphorylated-S6 ribosomal protein (Ser235/236) (Cell Signaling Technologies, RRID:AB\_2181035).

For the detection of *Pdgfra* transcripts on paraffin sections, we amplified a fragment as described by PCR (Orr-Urtreger et al., 1992) from cDNA prepared from a whole mouse embryo at E12.5. The reverse primer was prolonged by an additional T7 RNA polymerase recognition sequence

(taatacgactcactataggaga) added at the 5' end. *In vitro* probe synthesis, purification and a standard chromogenic *in situ* hybridization protocol were carried out as described (Thomas et al., 2018).

Standard hematoxylin-eosin (HE; with or without Alcian blue to detect sulfated glycosaminoglycans) staining protocols were followed for designated sections.

## 2.4 Microscopy

Gross anatomy was photographed with a Leica MZ6 dissecting microscope and images captured with a DFC450 camera before analysis using the open-source ImageJ software (v1.53). Histology and *in situ* hybridization slides were photographed on a Zeiss AxioScan 7 and immunofluorescent sections on a Zeiss AxioZoom, Apotome or LSM800-Airyscan microscope equipped with Zen software (v2.3 or 3.0). Centroid size of crania was quantified in ImageJ by delimiting the shape above a virtual line from the upper jaw to earlobe to occiput in the sagittal plane (Pilatti and Astúa, 2017).

## 2.5 Micro-X-ray computed tomography ( $\mu$ CT) examination

Late fetal (embryonic day [E]15.5-E20) specimens were genotyped and heads fixed overnight in 4% buffered paraformaldehyde at 4°C. They were stored in PBS + 0.1% w/v sodium azide before imaging on a X-ray micro-CT device (Quantum FX Caliper, Life Sciences, Perkin Elmer, Waltham, MA) hosted by the PIV sPlatform, EA2496, Montrouge, France. The X-ray source was set at 90 kV and 160  $\mu$ A. Tridimensional images were acquired with an isotropic voxel size of 20  $\mu$ m. Non-mineralized tissues were visualized after impregnating with Lugol's solution.

Tiff image stills were extracted from Dicom data frames using licensed 64-bit Irfanview imaging freeware (v4.59, <http://www.irfanview.com/>). 2D measurements were made in ImageJ after manual segmentation using contrast thresholding.

## 2.6 Statistical methods

Groups were compared for significant differences between the means of small samples drawn from normally distributed populations using Student's t-test and plots generated with Prism version 9.4.1 (GraphPad).

# 3 Results

## 3.1 Constitutively active *Pik3ca* in most neural crest leads to perinatal death and craniofacial malformations

In order to understand the effects of PI3K signaling in neural crest (NC) derivatives, we mated conditional, floxed *Pik3ca*<sup>H1047R</sup> and/or Tomato (*RdT*) reporter (Madisen et al., 2010) knock-in lines with *Wnt1-Cre* transgenic mice, which express Cre recombinase in nearly all NC-derived cells from pre-migratory stages onwards, as well as in the dorsal midline of the central nervous system (CNS), ventral forebrain and most midbrain neuroepithelium (Echelard et al., 1994; Danielian et al., 1998). This cross induced somatic mosaicism for constitutively active PI3K in only those animals carrying both a floxed *Pik3ca* and a *Cre* allele. This mosaicism was restricted to tissues having expressed the recombinase at any point before phenotypic analysis (Sauer, 1998).

No *Wnt1-Cre; Pik3ca*<sup>H1047R/+</sup> mice were recovered at weaning; in fact, all *Wnt1-Cre; Pik3ca*<sup>H1047R/+</sup> mice died within the first day after birth (n=12 mutants and 58 live sibs). The dead neonates did not present a belly milk spot and had notably large heads; three had cleft palates (**Figure 1**). In order to

## New models of *Pik3ca*-related disorders

better understood the causes and onset of death, we harvested mice at different stages of embryonic and fetal development up until birth. Mutants were compared to their unaffected control littermates expressing only one or neither of the *Wnt1-Cre* or *Pik3ca*<sup>H1047R/+</sup> alleles.

From E15.5 onwards, mutant crania were all visibly larger than controls (**Figure 1G**, n=12 mutants, 30 controls; p<0.01 at E20 and <0.001 at E15.5-E16; **Figure 2**). Body sizes appeared unaltered at all time points, but mutants had varying degrees of facial soft and calcified tissue hyperplasia as seen in micro-computed tomography (micro-CT; **Figure 2**). At E20, just prior to birth, mutant fetuses were macrocephalic with enlarged frontal, nasal as well as maxillary bones, relative to controls. Strikingly, the parietal bones overlying the burgeoning midbrain, of mesodermal origin in mice (Jiang et al., 2002), were hypocalcified in mutants relative to controls, while adjacent craniofacial skull components of NC origin were hypercalcified and hyperplastic (**Figure 2A-F**).

Measurements taken in three *Wnt1-Cre; Pik3ca*<sup>H1047R/+</sup> fetuses at E20 showed significantly thicker and wider mandibles than in controls (**Figure 2A-F**). Mutant mandibular bodies measured 1.457±0.176 mm high and 1.052±0.070 mm wide from the ramus base to just anterior to the molar alveolus, as compared to three control littermates at 0.847±0.101 high and 0.649±0.049 mm wide, respectively (p<0.01 in each dimension, **Figure 2K**).

Although only a quarter of the *Wnt1-Cre; Pik3ca*<sup>H1047R/+</sup> fetuses had a cleft secondary palate between E15.5 and birth, no such clefting was ever observed in controls (p<0.05). Possible additional explanations for perinatal death in mutants included adrenal dysfunction or cardiac malformation, organs dependent on neural crest-derived components for their morphogenesis. In addition, the pituitary controls adrenal function through the function of its corticotroph cells. We therefore compared organ sizes on soft tissue contrast-enhanced micro-CT sections from E15.5-E20 fetuses (n=10 mutants vs 10 controls, **Figure 2L**).

### 3.2 *Wnt1-Cre; Pik3ca*<sup>H1047R/+</sup> mice develop variable ocular and pituitary malformations

No significant differences in thymus, cardiac or adrenal sizes were measured at any age in *Wnt1-Cre; Pik3ca*<sup>H1047R/+</sup> mice relative to control littermates. In contrast, the pituitary gland was variably misshapen and significantly smaller in micro-CT frontal 2D cross-section at E15.5-E16 (n=5, p<0.01). However, volumetric analysis (**Figure 2L**) showed that by birth, the mutant pituitary gland (E16: 0.064±0.009 mm<sup>3</sup>, n=4; E20: 0.107±0.015 mm<sup>3</sup>, n=3) grew significantly larger than controls at the same age (0.046±0.007 mm<sup>3</sup>, p<0.05; and 0.040±0.029 mm<sup>3</sup>; p<0.05, respectively).

NC begin to migrate into the head after E8.5 (Kaucka et al., 2016); at E9.5, we observed that initial cranial and trunk-level NC migration appeared to be unimpeded in *Wnt1-Cre; Pik3ca*<sup>H1047R/+</sup>; *RdT* mice versus their *Wnt1-Cre; RdT* littermates (**Figure 3(A-B)**). Likewise, at E13.5 (**Figure 3(C-H)**), palatal shelves, head size and the position of the tongue had not yet developed obvious morphological differences. However, the eyes already appeared malpositioned.

Since signaling through the *Pdgfra* receptor for platelet-derived growth factor is known to be crucial for palatal development in both mice and humans (Tallquist and Soriano, 2003; Ding et al., 2004), we undertook *in situ* hybridization to its transcript. The expression pattern of *Pdgfra* was unaltered in the palatal NC-derived mesenchyme at E13.5, consistent with PI3K-mediated transduction being downstream of *Pdgfra* in these cells (He and Soriano, 2013). On sections, lens coloboma and microspherophakia, an enlarged epithelial *Pdgfra* domain expression overlying a lack of primary fibers, and a thickened cornea were already evident in mutants at E13.5 (**Figure 3(I-M)**).

### 3.3 PI3K signaling in NC-derived vascular smooth muscle induces venous malformations

One striking and constant feature of *Wnt1-Cre; Pik3ca*<sup>H1047R/+</sup> mutants were their craniofacial vascular malformations, also observable from E13.5 onwards (**Figure 4**). These most resembled venous malformations in that they were low-flow, circumscribed congenital lesions within the NC-derived dermis over the frontal bones and, frequently, in the maxillary and retroorbital regions (**Figure 4 (A-D)**). The malformations often contained thromboses and were also observed in the heart, in both ventricles and atria, but not in the trunk.

In order to examine the composition of these abnormal vascular structures, we examined the distribution of the mural pericyte and smooth muscle marker,  $\alpha$ -smooth muscle actin (aSMA) and the endothelial marker Pecam-1 (CD31) in *Wnt1-Cre; Pik3ca*<sup>H1047R/+</sup> mutants using immunofluorescence (**Figure 4 (E-F)**). Vascular smooth muscle of the cardiac great arteries, derived from posterior rhombencephalic NC cells, was present but disorganized; the nuclei were not organized in their usual concentric layers.

Within the intracardiac lesions, *Wnt1-Cre; Pik3ca*<sup>H1047R/+</sup>; *RdT* mutants showed co-expression of the Tomato NC lineage marker with aSMA in a discontinuous manner around the vascular lacunae (**Figure 4 (G), arrow**). Where aSMA was present, the cells were somewhat but not entirely disorganized and cuboid rather than lamellar within the vascular media. A cutaneous vascular malformation in the skin over the parietal bone in a late fetus at E20.5 (**Figure 4 (H)**) showed mutant aSMA-expressing, lineage-traced NC cells in dermal blood vessels surrounding the hair follicles.

### 3.4 PI3K signaling in muscle leads to widespread, progressive vascular anomalies

Despite the striking and lethal phenotype of *Pik3ca* constitutive activity in mesectodermal cephalic NC, we did not observe any major morphological changes in the trunk in *Wnt1-Cre; Pik3ca*<sup>H1047R</sup> mutants either in whole mount or at birth after autopsy. This included the NC derivatives of the adrenal medulla and the enteric, autonomic or sensory nervous systems. In order to examine a subset of cardiac NC in the developing tricuspid valves (Odelin et al., 2018), we crossed the conditional, floxed *Pik3ca*<sup>H1047R</sup> and/or Tomato (*RdT*) reporter knock-in lines to the *Krox20-Cre* transgenic line, where Cre recombinase is expressed in the place of one allele of the conserved zinc finger transcription factor *Egr2* (Voiculescu et al., 2000).

*Krox20* has previously been shown to be expressed in tendons, chondrocytes and osteocytes as well as in a subpopulation of embryonic hindbrain NC cells and myelinating Schwann cells throughout life (Voiculescu et al., 2000; Maro et al., 2004). We therefore examined *Krox20-Cre*<sup>+/-</sup>; *Pik3ca*<sup>H1047R/+</sup> mice for signs of cardiac insufficiency from myxomatous valves, for skeletal defects or for peripheral neuropathy.

*Krox20-Cre; Pik3ca*<sup>H1047R/+</sup> were initially healthy and viable, but over time post-weaning developed palpable lumps under the skin on the back, leg or tail and had soon reached a humane endpoint. Upon autopsy, we discovered widespread, lobular vascular structures filled with coagulated blood in the subcutaneous *panniculus carnosus* muscle, but also in and around skeletal, cardiac and smooth muscles, the lungs, the reproductive organs and many other densely vascularized tissues (**Figure 5 (A-D, G-T)**). These vascular lesions had cavernoma-like fibrous septa, and the adjacent nerves were surrounded by loose fat. No phleboliths were observed and hearts appeared normal. To our surprise, myelinated sciatic nerves showed no macroscopic or functional differences between mutant and control mice. However, mutant mice systematically developed splenomegaly (**Figure 5(E, F)**).

## New models of *Pik3ca*-related disorders

*Krox20-Cre<sup>+/-</sup>*; *Pik3ca<sup>H1047R/+</sup>*; *RdT<sup>+/-</sup>* mice, like their *Krox20-Cre<sup>+/-</sup>*; *RdT<sup>+/-</sup>* counterparts, expressed the fluorescent Tomato marker in the smooth muscle of the gonad (**Figure 5(H)**); in finely ramified cells, probably reticular fibroblasts, in the spleen (**Figure 5(J)**); and in skeletal muscles throughout the body. As expected, cells in the aorta and pulmonary trunk were derived from *Krox20*-expressing progenitors (**Figure 5(L)**), but there were also scattered, filamentous cells throughout the walls of the ventricles and to a lesser extent, the atria, corresponding to the sites of developing cardiac vascular lesions in *Pik3ca<sup>H1047R</sup>* mutant animals (**Figure 5(D, I, M)**). A search for *Egr2* expression in a recent multi-organ database of single adult mouse fibroblasts and vascular mural cells (<https://betsholtzlab.org/Publications/FibroblastMural/database.html>) (Muhl et al., 2020) demonstrated that the cells that had expressed *Krox20-Cre* to induce *Pik3ca<sup>H1047R</sup>* were likely to be endomysial and perimysial fibroblasts in cardiac and skeletal muscle, myelinating Schwann cells and endoneurial fibroblasts in the peripheral nerves, and a previously undefined subtype of vascular pericytes, fibroblasts and smooth muscle.

Indeed, fascicles of the peripheral nerves, including autonomic, and a ring of probable pericytes (Topilko, 2019) at the base of hair follicles in the non-glabrous skin strongly expressed RdT in adulthood (**Figure 5(L, N, O)**). These lineage observations are compatible with the independent single-cell data (Muhl et al., 2020) and account for the unexpectedly widespread, progressive vascular phenotypes in *Krox20-Cre<sup>+/-</sup>*; *Pik3ca<sup>H1047R/+</sup>* mutant mice.

### 3.5 *Egr2*-driven *Pik3ca<sup>H1047R/+</sup>* expression induces postnatal pituitary and intramuscular arterial remodeling

Since *Krox20-Cre<sup>+/-</sup>*; *Pik3ca<sup>H1047R/+</sup>* mice survived to adulthood, we made a cursory examination of the pituitary gland for morphological or functional anomalies to compare to the *Wnt1-Cre<sup>+/-</sup>*; *Pik3ca<sup>H1047R/+</sup>* phenotype. Lineage tracing with the *RdT* allele as above demonstrated that most if not all cells of the adenohypophysis, unlike the neurohypophysis, had once expressed the *Krox20* transcription factor (**Figure 6(A-F)**). Examination of the capillary network in control mice with Pecam1 (CD31) immunofluorescence in confocal microscopy showed that some Pecam1+ cells also showed Tomato fluorescence and thus had also once expressed *Egr2/Krox20* (**Figure 6(C-F)**, arrowheads). Intriguingly, *Pik3ca*-mutant mosaic pituitaries had visibly fewer RdT+ cells and a concomitant decrease in Pecam1+ / RdT+ cell density (**Figure 6(G-J)**, n=7), although not in organ size. Cavernoma-like lesions were never observed in *Krox20-Cre<sup>+/-</sup>*; *Pik3ca<sup>H1047R/+</sup>* pituitaries (n=22).

A recent report implicated increased PI3K signaling in the formation of cerebral cavernous malformations (CCMs) and phosphorylated S6 (p-S6) ribosomal protein expression as its endothelial intermediary (Ren et al., 2021). We therefore sought, but did not observe, similarly increased expression of p-S6 in the vascular endothelium of *Krox20-Cre<sup>+/-</sup>*; *Pik3ca<sup>H1047R/+</sup>* mice (**Figure 6(O, S)**). Increased expression was sometimes observed in the abnormally shaped walls of muscular cavernomas, which co-expressed the vascular smooth muscle cell marker, alpha-SMA (**Figure 6(M, O, arrows)**). No increase was seen in the thickened, disorganized smooth muscle walls of the coronary artery (**Figure 6(Q, S)**).

### 3.6 Melanocytic and other tumors

In many *Krox20-Cre<sup>+/-</sup>*; *Pik3ca<sup>H1047R/+</sup>* mutants, vascular anomalies were accompanied by widespread, extracutaneous pigmented melanocyte deposits (**Figure 7(A)**). In the meninges of the head, although some melanocytosis is physiological in mice (Gudjohnsen et al., 2015), the olfactory lobes (**Figure 7(B)**) and trigeminal nerves were covered in a melanocytic mesh. Pigmented

melanocytes were also conspicuous in the capillary network of the lower incisor gingiva (**Figure 7(C)**), which has not been described to our knowledge as a site for extracutaneous melanocytes.

Four adults developed melanocytic tumors in addition to their vascular anomalies (**Figure 7(D)**). These regularly invested distant lymph nodes and were found in multiple sites, but without typical melanoma-like metastasis to brain, liver or lung, where tumors were never observed. A rhabdomyomatous mesenchymal hamartoma was also observed in the inner thigh of one mutant mouse (**Figure 7(E)**).

Peripheral nerve Schwann cells must express *Egr2/Krox20* to myelinate, and can shuttle between a differentiated, myelinating mature and a non-myelinating, immature state depending on tissue needs (Decker et al., 2006). Furthermore, immature Schwann cells give rise to melanocytes under both physiological or pathological conditions (Adameyko et al., 2009). We hypothesized that Schwann cells that had expressed *Krox20* and undergone a phenotypic switch in mutants after expression of constitutively active *Pik3ca* could be the source of the widely distributed extracutaneous melanocytes. To test this *in vivo*, but bypass the lethal phenotype of *Wnt1-Cre; Pik3ca<sup>fl(H1047R)/+</sup>* mice, we targeted nerve-resident peripheral glial precursors (Deal et al., 2021) by crossing *Sox10-CreER<sup>T2</sup>* mice with floxed *Pik3ca<sup>fl(H1047R)/+</sup>* mice. This allowed us to induce *Pik3ca<sup>fl(H1047R)</sup>* expression at will after exposing *Sox10*-expressing cells to the metabolically active tamoxifen derivative, 4-hydroxy-tamoxifen (4OH-TAM).

Four female *Sox10-CreER<sup>T2</sup>; Pik3ca<sup>H1047R/+</sup>* mice from two litters were injected with 1 mg 4OH-TAM at 15-19 weeks and compared to four similarly treated *Sox10-CreER<sup>T2</sup>; RdT* mice (three female, one male) and one female *Pik3ca<sup>fl(H1047R)/+</sup>* controls of the same age. Within five days, one mutant had died and the three others had attained a humane endpoint and were euthanized. Gross examination of the *Sox10-CreER<sup>T2</sup>; RdT* mice under a fluorescence binocular dissecting microscope demonstrated effective recombination had been induced in all, although autopsy did not reveal the causes of morbidity or mortality. No widespread melanocytosis or vascular tumors were noted. The superficially pigmented axillary and Peyer's patch lymph nodes had enlarged germinal centers, and the ovaries were cystic in all three surviving female *Pik3ca*-mutant mice (**Figure 7(F)**).

We conjectured that constitutively active PI3K signaling in post-migratory NC and other *Sox10*-expressing cells may predispose the later Schwann cell progenitors to melanocytosis. To test this idea, *Sox10-CreER<sup>T2</sup>* males were mated to three *Pik3ca<sup>fllox(1047R)/+</sup>* females and the pregnant dams treated at E18.5 with 4OH-TAM. This led to recovery of a total of ten live births: five *Sox10-CreER<sup>T2</sup>; Pik3ca<sup>H1047R/+</sup>* (three female, two male), four *Sox10-CreER<sup>T2</sup>* and one male *Pik3ca<sup>H1047R/+</sup>* mouse. In contrast to the induction of *Pik3ca* mutation in adulthood, these prenatally induced animals were followed without incident for up to 1 year, when one male mutant rapidly developed an unpigmented, circumscribed tail tumor of 5 mm in diameter and showed signs of distress. After euthanasia, varied cellular elements including smooth muscle and mucin-containing myxoid zones that stained with Alcian blue were found in the tumor (**Figure 7(G)**).

## 4 Discussion

The work presented above shows some of the complex developmental effects of constitutive PI3K signaling on interdependent organ systems in the context of mosaicism. These range from the jaws to the brain and from blood vessels to pigment cells. Three new, mechanistically related mouse models complement one another to demonstrate pathogenic diversity.

### 4.1 Vascular tumor-like malformations arise from impaired endothelial-mural interactions



## New models of *Pik3ca*-related disorders

*PIK3CA* gain-of-function mutations lead to constitutive activation of Akt downstream of the TEK angiopoietin-1 receptor in human vascular endothelial cells (Limaye et al., 2015) as well as in endothelial cells of targeted mouse models (Castillo et al., 2016). Nearly half of sporadic venous malformations (VMs) bear activating *TEK* mutations while most others express activating *PIK3CA* H1047R, or E452K or C420R mutations, in a mutually exclusive manner (Castel et al., 2016). These, particularly H1047R, are also the most frequent hotspot mutations for malignancies in nearly 50 sites and in over 21,000 samples curated by COSMIC (v95) to date (Tate et al., 2019; Avramović et al., 2021).

The work we present here is the first to demonstrate that activation of a complex signaling pathway by the identical mutation in perivascular pericytes and vascular smooth muscle, rather than endothelial cells, also can induce congenital vascular malformations. It has long been understood that paracrine signaling between adluminal and abluminal cells is necessary for tissue-appropriate, functional blood and lymphatic vessel assembly. Pharmacological PI3K inhibition rescues inducible arteriovenous malformations in the context of an inducible animal model for a recurrent transforming growth factor- $\beta$  (TGF- $\beta$ )/bone morphogenetic protein (BMP) signaling pathway gene mutation, known to cause hereditary hemorrhagic telangiectasia (Ola et al., 2016).

Unlike a recent mouse model for cerebral cavernous malformations due to *Pik3ca* mutation (Ren et al., 2021), p-S6 is not the principal mediator of PI3K signaling in the adult cavernoma-like vascular lesions we observed in mice with mutant *Pik3ca* in cells having once expressed *Egr2/Krox20*. A punctual, rather than sustained, earlier stimulus may thus be sufficient to launch the process of tissue overgrowth. Further functional work will be needed to define the additional mediators and intracellular effectors of endothelial-mural paracrine exchanges in these new models.

NC cells are a minority but crucial lineage in cardiovascular function and development. As contributors to melanocytic, glial, parasympathetic neuronal and a small fraction of pericytic and cardiomyocyte lineages, their role is essentially paracrine. The fact that both *Wnt1-Cre; Pik3ca*<sup>H1047R/+</sup> and *Krox20-Cre; Pik3ca*<sup>H1047R/+</sup> mice both present vascular anomalies within cardiac tissue implies that signaling through the PI3K pathway to a cell of NC origin in the heart has an impact on its subsequent secretory activity, with a similar effect on intracardiac vascular development as in the head and neck. In the future, single-nucleus RNA sequencing of cardiac ventricles and craniofacial mesenchyme in these mouse crosses could identify such vasculogenic factors secreted by lineage-traced cardiac pericytes and glia.

We further observed mutant, lineage-traced NC cells in malformed dermal blood vessels over the parietal bone. This observation was remarkable since the NC-derived dermis, vascular pericytes, craniofacial bones and forebrain meninges usually occupy the same territories of the ventral head, face and neck (Etchevers et al., 1999) and share clonal origins in mice (Kaucka et al., 2016). Given that the mouse parietal bone is of mesodermal rather than NC origin, as shown by lineage tracing in a cross of the same *Wnt1-Cre* line with a conditional reporter allele (Jiang et al., 2002), overgrowth promoted by PI3K signaling may enable some mesenchymal NC derivatives to expand into ectopic cranial regions before birth.

### 4.2 PI3K activity in NC cells also induces macrocephaly, jaw hyperplasia and cleft palate

The constitutive activation of PI3K in cells having expressed *Wnt1* in the neuroepithelium before NC migration also led to apparently autonomous effects, with macroscopic megalencephaly of the forebrain and midbrain. Of cephalic NC derivatives, only the mesectodermal subpopulation appeared affected (Le Lievre and Le Douarin, 1975). Lineage tracing with a floxed *Rosa*-tomato fluorescent

reporter allele did not show any differences in initial NC distribution after migration into the face and head at E9.5, implicating PI3K signaling in the later differentiation of some cephalic NC-derived mesenchyme into perivascular cells and other connective tissues, a potential outcome not available to truncal NC progeny in mammals (Etchevers et al., 2001; Deal et al., 2021). This discrepancy between head and body may explain why there were no apparent morphological effects at the level of the trunk or in the size of the dorsal root and cranial ganglia in *Wnt1-Cre; Pik3ca*<sup>H1047R/+</sup> neonates.

When cranial NC expresses a constitutively active *Pik3ca* subunit, vascular and jaw hyperplasia result. A clear association between vascular and craniofacial overgrowth has been reported clinically for decades, well before molecular genetics caught up (Krings et al., 2007). Facial capillary malformations found in Sturge-Weber syndrome are regularly associated with segmental overgrowth of the orbit or the jaw. This disease is usually caused by constitutively activating, somatic *GNAQ* mutations (Shirley et al., 2013) but rarer somatic mutations, including a pathogenic one in *PIK3CA* (Lian et al., 2014), have been reported. G-protein and PI3K signaling cascades are thus both likely to mediate the exchanges of vascular cross-talk with NC-derived mesenchyme and subsequent skull growth anomalies.

Our intriguing observation that parietal bones were undercalcified in the presence of hyperplastic frontal bones just before birth may be due to an excess of NC-derived cranial mesenchyme, produced under the influence of oncogenic *Pik3ca*. Genetically induced increases in neural crest mesectoderm relative to mesodermal mesenchyme, achieved by tweaking components of the Hedgehog and fibroblast growth factor signaling pathways, lead to proportionately larger frontal than parietal bones, to the extent of parietal aplasia, as well as palate malformations (Tabler et al., 2016). Differences in PI3K signaling within the osteogenic NC of different vertebrate species and their paracrine influence on the neighboring, ancestral osteogenic mesoderm may be responsible for the diverse morphological specificities of homologous skull bones. These homologies have been a long-standing source of controversy in evo-devo (Noden and Trainor, 2005; Carroll, 2008).

### 4.3 Congenital overgrowth usually does not lead to malignancy but presents its own problems

While nearly half of overgrowth PRD patients in one cohort presented congenital vascular malformations, tissue overgrowth in the vast majority continued to evolve postnatally (Keppler-Noreuil et al., 2014). Somatic mutation of codon H1047 is frequently but not exclusively implicated in asymmetric, multi-systemic *PIK3CA*-related overgrowth disorders such as CLOVES [OMIM 612918; congenital lipomatous overgrowth, vascular malformations, epidermal nevi and skeletal abnormalities] and endophenotypic segmental overgrowth syndromes affecting muscle and fat, or fibroadipose hyperplasia. Another class of PRDs involve megalencephaly with various other features affecting musculoskeletal, vascular, connective and adipose tissues, of which megalencephaly-capillary malformation-polymicrogyria syndrome (MCAP) is emblematic (Lee et al., 2012; Kingsmore et al., 2013; Alcantara et al., 2017). Some patients develop supernumerary, hypertrophic muscles in the upper limbs; these are occasionally bilateral, indicating that the original somatic mutation may have developed in a cell whose progeny entered the paraxial mesoderm cell during gastrulation (Frisk et al., 2019). PI3K inhibitors have been very promising in clinical trials for these conditions (eg. Dill et al., 2014; Roy et al., 2015; Venot et al., 2018; Hori et al., 2020)

Malignant tumors in PRD patients are surprisingly rare, given that they express proven oncogenic mutations, and this finding was borne out in our mouse models. However, the resultant malformations themselves were not always compatible with viability.

## New models of Pik3ca-related disorders

We have observed that benign vascular and/or hamartoma-like tumors arise postnatally in mice expressing constitutively active *Pik3ca* in a mosaic fashion, in cells having expressed the *Krox20/Egr2* or *Sox10* transcription factors. Both of these transcription factors are hallmarks of so-called “Schwann cell precursors” or SCP. SCP are NC-derived, non-myelinating cells that reside along or at the terminal ends of peripheral nerves, and that can respond to environmental changes such as injury or inflammation by differentiating into myelinating Schwann cells and endoneurial fibroblasts but also melanocytes in rodents (Adameyko et al., 2009). Interestingly, these resident, poised cells also normally contribute extracutaneous melanocytes to the heart, inner ear, ocular choroid plexus, to the perimyseal layers of some skeletal (unpublished observations) and the CNS meninges (Kaucka et al., 2021).

Even without additional PI3K activity, modest melanocytosis was seen in the hypothalamic meninges and membranes surrounding the trigeminal nerves of adult pigmented *Krox20-Cre;RdT* mice. In contrast, agouti or black tamoxifen-induced *Sox10-CreER<sup>T2</sup>* control mice had only normal meningeal pigmentation (Gudjohansen et al., 2015). Dosage reduction of *Egr2* may thus be a prerequisite to SCP plasticity, as the *Krox20-Cre* allele replaces one copy of *Egr2* with *Cre* (Voiculescu et al., 2000). Neither early nor late induction of constitutively active PI3K signaling in *Sox10-CreER<sup>T2</sup>; Pik3ca<sup>H1047R/+</sup>* mice leads to melanocytosis, but rather to other tumors. Our observations support other recent studies that highlight the importance of positional and lineage context for the neoplastic potential of oncogenic mutations (Baggiolini et al., 2021) and imply that it may extend beyond MAP kinases to the PI3K signaling pathway.

The partial commitment in multipotent progenitors at any stage of life, rather than their original lineage, seems to make them particularly vulnerable to overgrowth as an effect of constitutively active PI3K signaling.

#### 4.4 *Pik3ca*-related disorders may encompass previously unsuspected pathologies

The wide variety and range in severity of PRD phenotypes is attributed in part to the location of the cells bearing the mutation and to the proportion of cells affected in each of any given patient’s tissues. We identified effects of constitutive PI3K signaling on pituitary and palatal development that are not features of the diverse PRDs already identified to date.

Adrenal insufficiency could contribute to perinatal mortality in our *Wnt1-Cre; Pik3ca<sup>H1047R/+</sup>* mice, since when constitutive Akt signaling is induced in the embryonic ectoderm, crucial proteins for differentiation of the corticotroph lineage, such as *Bmp4* and *Tbx19*, are significantly down-regulated in mice (Segrelles et al., 2008). If so, this would be another measure of paracrine NC effects on pituitary development. The nature of the paracrine activity exerted by NC-derived cells, and its effects on adrenal function, could be further investigated in these mouse models.

Lineage-traced *Krox20-Cre; RdT* mice showed a much broader distribution of cells in the body that had once or continued to express *Egr2* than previously described. Evidence exists that some of these are cutaneous vascular pericytes derived from Schwann cell precursors, themselves from a NC-derived “boundary cap cell” population residing adjacent to the spinal cord (Gresset et al., 2015; Topilko, 2019). However, many also appear to be specialized fibroblasts primed by this transcription factor (Muhl et al., 2020). The cutaneous SCP-derived pericyte may in fact be a specialized myofibroblast, a subject for future studies in fibroblast diversification.

The sites of predilection for *Krox20-Cre; Pik3ca<sup>H1047R/+</sup>* vascular lesions were within the *panniculus carnosus* and epaxial skeletal muscle groups, compatible with intramuscular hemangioma, a tumor

rather than a vascular malformation (Tan et al., 2007; Kurek et al., 2012). Unlike soft-tissue angiomas, we did not observe a mature adipose or lipomatous component to these lesions, or indeed in any of the other described mouse models. However, adipocytes do collect around peripheral nerves (**Figure 5(A-B)**) in our *Krox20-Cre; Pik3ca*<sup>H1047R/+</sup> mice. This observation may be relevant for the study of fibrolipomatous hamartoma, which like other PRDs is associated with overgrowth of the innervated territory (Marek et al., 2021). It also helps explain why mutations in *PTEN* are frequently associated with intramuscular vascular anomalies, since they lead indirectly to PI3K pathway activation (Tan et al., 2007; Ho et al., 2012).

Recently, gain-of-function *Pik3ca* mutations have been shown to be sufficient to drive small, postnatal capillary hemangiomas in brain endothelial cells and are necessary, in combination with mutations of known CCM genes in mice or in humans, for the development of large postnatal cavernomas (Hong et al., 2021; Ren et al., 2021). Should *PIK3CA* mutations also be confirmed in human intramuscular hemangiomas or fibrolipomatous hamartomas, they would be the functional and tumoral counterpart of soft-tissue hamartomas due to *PTEN* mutations (Kurek et al., 2012; Luks et al., 2015; Tachibana et al., 2018). In these congenital and predisposing conditions, evolving anomalies are not always surgically accessible and can be aggravated in the case of incomplete resection. Targeted inhibitors of distinct pathway levels, locally infused and/or in combination, show great promise and can now be tested in a wider range of tailored animal models.

## 5 Figures

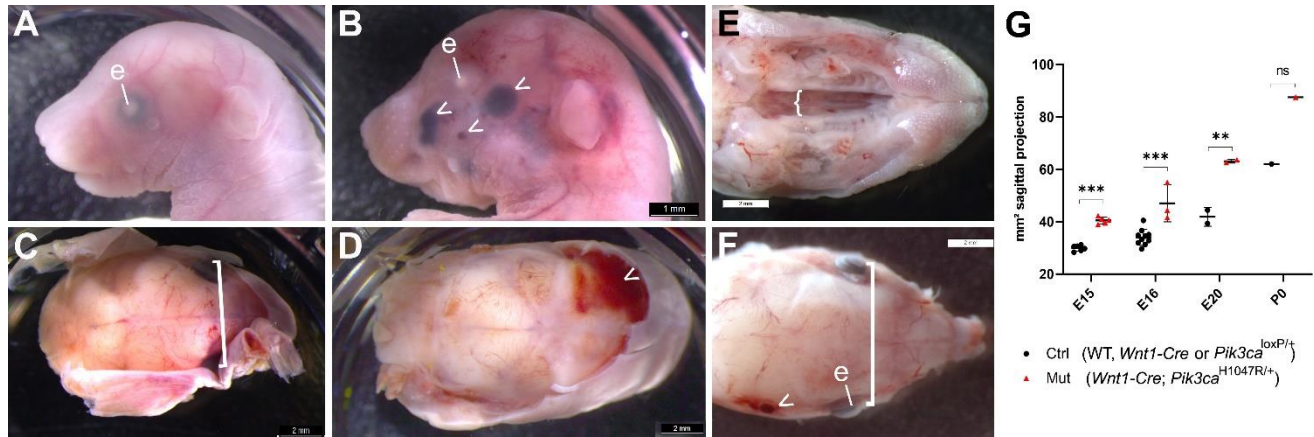

**Figure 1.** Mutants compared to their unaffected control littermates expressing only one or neither of the *Wnt1-Cre* or *Pik3ca*<sup>H1047R/+</sup> alleles.

- (A) At E20, fetal head from control littermate of (B) at same magnification, facing left.  
 (B) At E20, mutant fetuses and newborns had visible megalencephaly, displaced eyes above an enlarged maxillary primordium and skull vault, larger external ears, a longer nose, and facial vascular malformations or tumors, sometimes hemorrhagic (arrowheads). Bar, 1 mm.  
 (C) Same fetus as in (A), skin removed and relative interocular distance indicated in square bracket. Bar, 2 mm.  
 (D) Same fetus as in (B), skin removed to see hemorrhage from ruptured vascular lesions. Bar, 2 mm.  
 (E) *Wnt1-Cre*<sup>+/-</sup>;*Pik3ca*<sup>H1047R/+</sup> mutant newborn at P0, view of cleft palate (bracket) after removal of skin and jaw. Bar, 2 mm.  
 (F) *Wnt1-Cre*<sup>+/-</sup>;*Pik3ca*<sup>H1047R/+</sup> mutant newborn at P0, coronal view of cleft palate (bracket) after removal of skin and jaw, relative interocular distance indicated in square bracket at same scale as (C). Arrowhead, vascular lesion. Bar, 2 mm.  
 (G) Maximum sagittal plane surface projection of lateral photographs from embryos at the indicated stages between embryonic day (E)15 and birth (P0), of either control (ctrl) littermate or *Wnt1-Cre*<sup>+/-</sup>; *Pik3ca*<sup>H1047R/+</sup> (mut) genotype. Through the last third of gestation, mutant heads were significantly larger than controls, as was the head of the sole neonate recovered.  
 ctrl, control; e, eye; mut, mutant

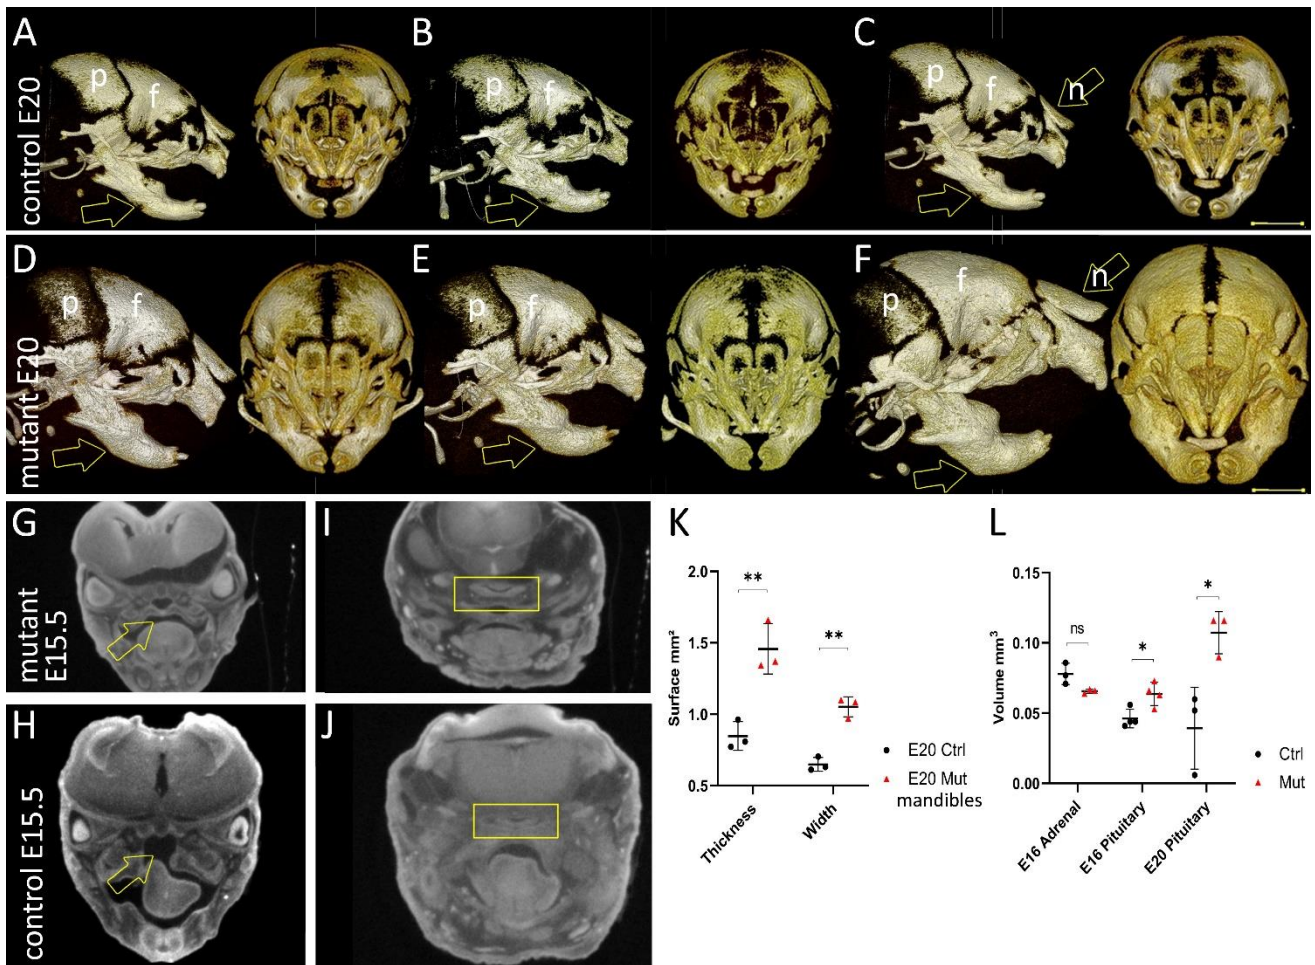

**Figure 2.** Micro-computed tomography (micro-CT) of skull development in *Wnt1-Cre*<sup>+/-</sup>; *Pik3ca*<sup>H1047R/+</sup> mice at late fetal stages.

(A-C) 3D projections in frontal and sagittal views of the more advanced mineralization of three representative skulls of control littermate fetuses at E20.5 relative to mutants in (D-F), within neural crest-derived craniofacial bones. Arrows indicate point of measurements of mandibular bone thickness in (K).

(G) Control littermate fetus at E15.5 relative to mutant in (H) –frontal micro-CT section through eyes, brain, palate (arrow), tongue and jaw.

(H) Mutant littermate embryo of E15.5 embryo in (G) –frontal micro-CT section through eyes, brain, cleft palate with malpositioned tongue (arrow) and jaw.

(I, J) Frontal sections through the pituitary gland (yellow rectangle) in a control (I) or *Wnt1-Cre*<sup>+/-</sup>; *Pik3ca*<sup>H1047R/+</sup> (J) fetus at E15.5.

(K) Measurements from the ramus base to just anterior to the molar alveolus, in both rostrocaudal thickness (height) and mediolateral width, show significant enlargement of mutant mandibles by birth.

(L) Segmentation analysis of the volumes of the adrenal and pituitary glands at E16 and the pituitary at E20, showing that unlike the adrenal gland, there is a significant increase in pituitary size at the end of gestation.

f, frontal; n, nasal; p, parietal; \* = p<0.05; \*\* = p<0.01.

## New models of *Pik3ca*-related disorders

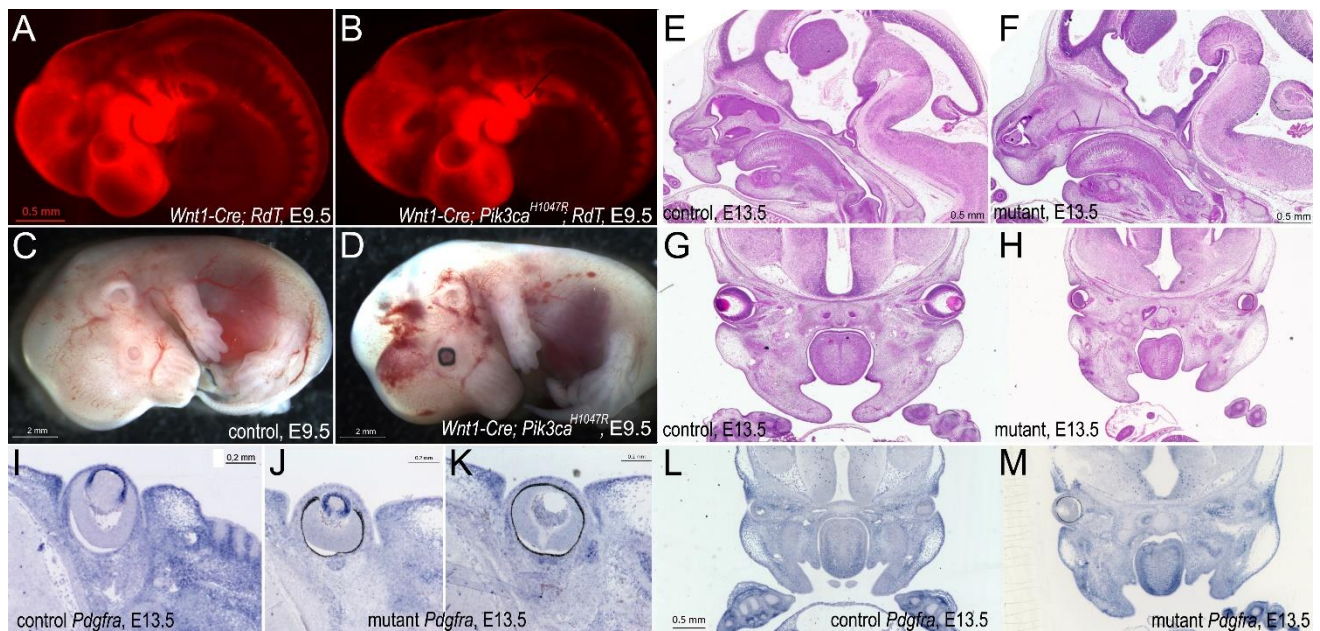

**Figure 3.** Phenotypes of *Wnt1-Cre*<sup>+/<sub>0</sub></sup>; *Pik3ca*<sup>H1047R/+</sup> embryos from E9.5 to E13.5.

(A) When lineage-traced by co-expression of a *RdT*<sup>+/<sub>0</sub></sup> allele to transcribe Tomato red fluorescent protein in cells having expressed *Wnt1*, *Wnt1-Cre*<sup>+/<sub>0</sub></sup>; *RdT*<sup>+/<sub>0</sub></sup> embryos at E9.5 show the normal distribution of neural crest (NC) mesenchyme in the face and pharyngeal arches. Bars = 0.5 mm for A, B.

(B) *Wnt1-Cre*<sup>+/<sub>0</sub></sup>; *Pik3ca*<sup>H1047R/+</sup>; *RdT*<sup>+/<sub>0</sub></sup> embryos at E9.5 show unaltered distribution of NC-derived mesenchyme in the pharyngeal arches, frontonasal bud or body.

(C) Left side of E13.5 control littermate to (D). Lack of pigment in retinal pigmented epithelium of eye is normal for a mouse that would have been born albino (*Tyr*<sup>c/ Tyr</sup><sup>c</sup>), a background allele (<http://www.informatics.jax.org/allele/MGI:1855976>). Bars = 2 mm for C, D.

(D) Left side of E13.5 *Wnt1-Cre*<sup>+/<sub>0</sub></sup>; *Pik3ca*<sup>H1047R/+</sup> littermate to (C), showing vascular anomalies and cerebral hemorrhage.

(E) Paraffin parasagittal section of control littermate head of (F) at E13.5, stained with HE. Bars = 0.5 mm for E, F, G, H, L, M.

(F) Paraffin sagittal section of mutant head at E13.5 showing enlarged frontonasal and mandibular tissues, cerebellar isthmus and choroid plexus, as well as a malpositioned Rathke's pouch relative to the infundibulum, stained with HE.

(G) Paraffin frontal section of control head at E13.5 showing physiological position of tongue between palatal shelves and converging maxillary processes, stained with HE.

(H) Paraffin frontal section of mutant littermate of (G) at E13.5, showing lens coloboma, thickened corneal epithelium and less convergent maxillary processes than in (G), stained with HE.

(I) *In situ* hybridization with a *Pdgfra* probe in a control embryo at E13.5 shows transcript expression in blue in craniofacial mesenchyme around the ocular primordium, particularly in the lens epithelium and corneal stroma, but not in the lenticular primary fibers. Bars I, J, K = 0.2 mm.

(J) Mutant embryos express *Pdgfra* normally within the ocular primordium at E13.5, but have microphakia.

(K) An adjacent section to (J) shows an enlarged, *Pdgfra*<sup>+</sup> hyaloid vasculature relative to the control embryo section in (I).

(L) A control frontal section at E13.5 after *Pdgfra* *in situ* hybridization.

(M) A mutant frontal section of an embryo at E13.5 after *Pdgfra* *in situ* hybridization. Palatal, digital or mesenchymal expression are not qualitatively different.

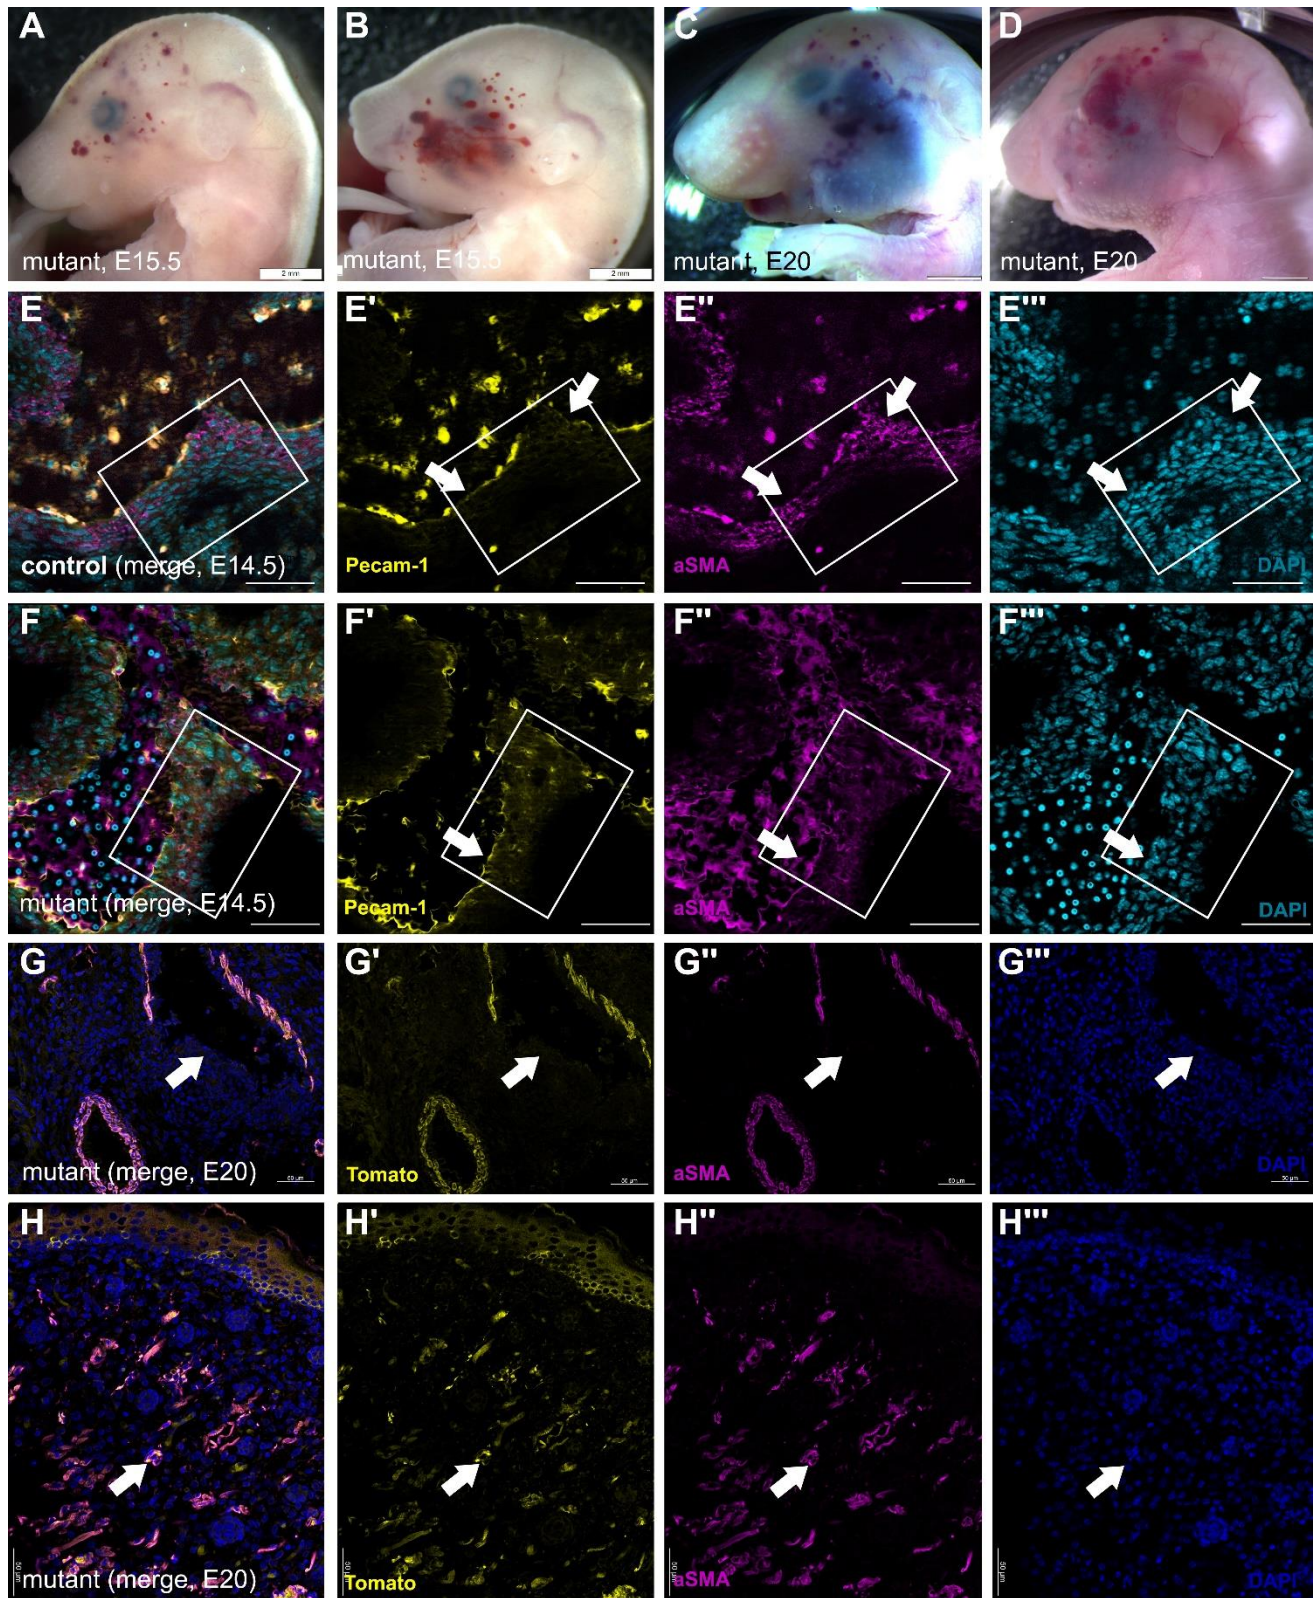

**Figure 4.** Vascular lesions are present before birth with disorganized mural elements in *Wnt1-Cre; Pik3ca<sup>H1047R/+</sup>* mutants.

(A) Mutant embryo at E15.5 with periocular vascular anomalies.



## New models of *Pik3ca*-related disorders

(B) Mutant littermate of (A) with segmental vascular anomalies in the maxillary region.

(C, D) Mutant E20 fetuses of distinct litters. (C) was dead *in utero* and had a vascular lesion on the mandible. All show maxillary and posterior periocular vascular anomalies and megalencephaly. Scale bars A-D, 2 mm.

(E) Control littermate and (F) mutant pulmonary trunk; merged immunofluorescence (E', F'): yellow, endothelial marker Pecam-1 (CD31); (E'', F'') purple, smooth muscle marker,  $\alpha$ -smooth muscle actin (aSMA); (E''', F''') blue, nuclear marker DAPI. Bars E, F = 50  $\mu$ m. Despite maintenance of endothelium (arrows) in the mutant great artery, boxed areas indicate disruption of the laminar smooth muscle organization of the vascular wall at E14.5.

(G) Cellular organization around an intracardiac vascular anomaly at E20.5, showing a discontinuous (arrow) smooth muscle layer of mutant NC origin in a distinct litter from the ones represented in C, D.

(H) Facial skin of E20.5 mutant fetus (littermate of G) with numerous double-labeled, small capillary anomalies in upper dermis (arrow) around hair follicles.

(G', H'): Tomato fluorescent protein; (G'', H''): smooth muscle marker,  $\alpha$ -smooth muscle actin (aSMA); (G''', H''') nuclear marker DAPI in blue. Bars G, H = 50  $\mu$ m.

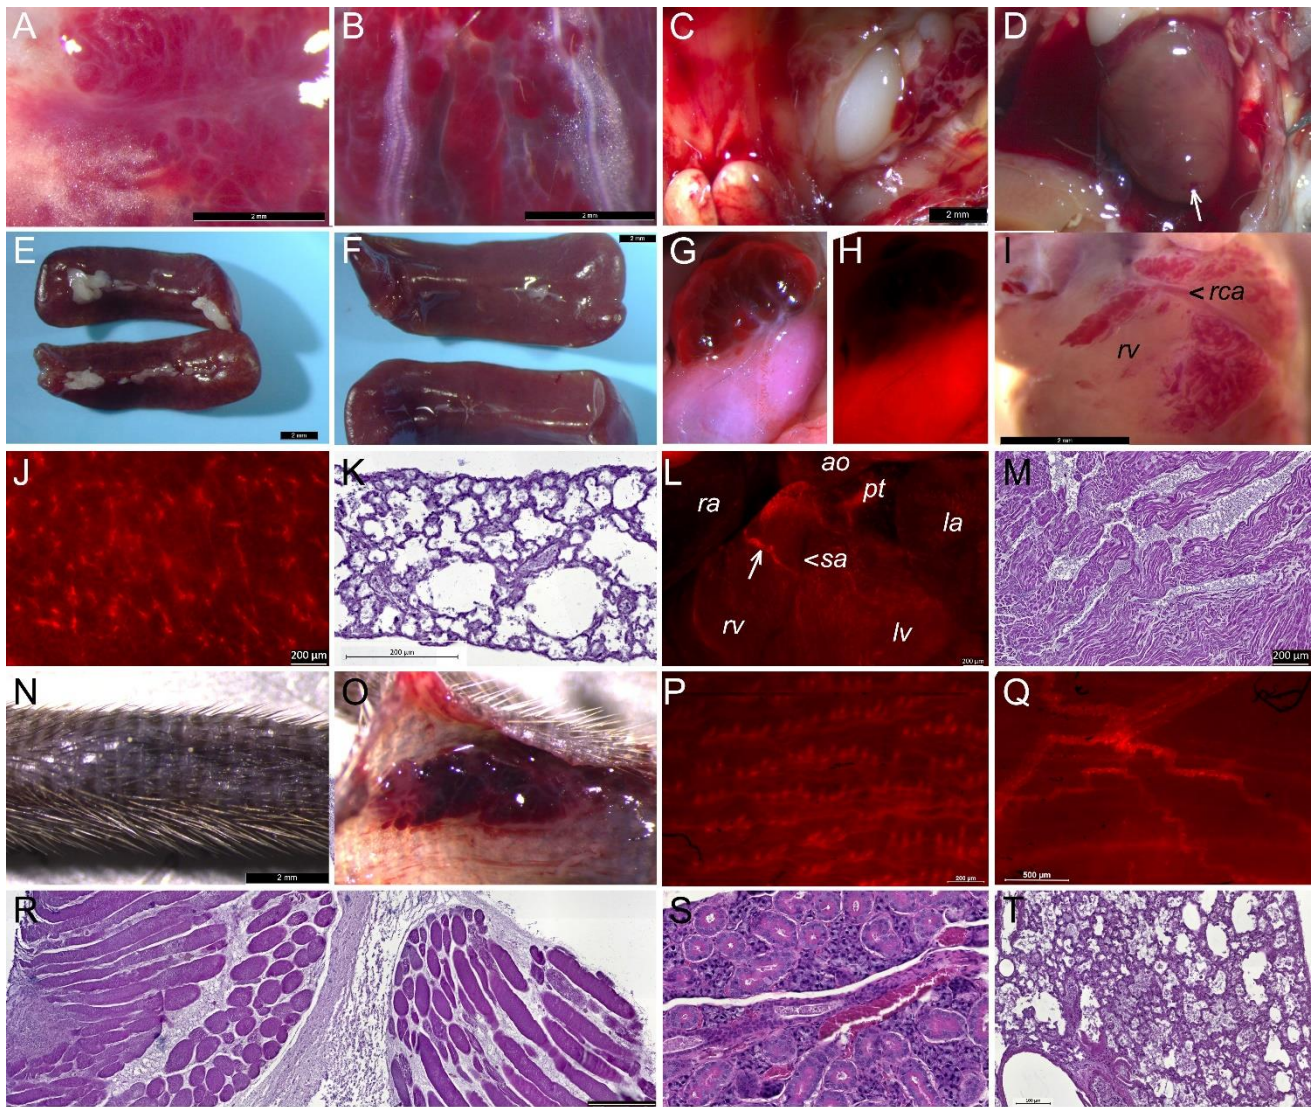

**Figure 5.** Anatomy and histology of vascular anomalies in *Krox20-Cre<sup>+/o</sup>; Pik3ca<sup>H1047R/+</sup>* adult mutant mice.

- (A) Subcutaneous vascular anomaly, epaxial (*longissimus dorsi*) muscle. Bars A-I: 2 mm.  
 (B) Subcutaneous vascular anomaly, quadriceps.  
 (C) Vascular anomalies around left gonad.  
 (D) Mutant heart, small vascular anomaly at apex (arrow).  
 (E) Control littermate spleens of those in (F).  
 (F) Mutant spleens, same scale as (E).  
 (G, H) Vascular tumor around gonad from different mouse than in (C), *Krox20-Cre<sup>+/o</sup>; Pik3ca<sup>H1047R/+</sup>; RdT<sup>+/o</sup>*. The fluorescent fibroblasts in gonad and lesional septa had expressed Krox20 and thereby, constitutively active Pik3ca.  
 (I) Intracardiac vascular anomalies were present in all mutant adults examined.  
 (J) *Krox20-Cre<sup>+/o</sup>; Pik3ca<sup>H1047R/+</sup>; RdT<sup>+/o</sup>* spleens as in (F) had numerous fluorescent ramifications consistent with reticular fibers, peripheral nervous or perivascular elements. Bar, 200  $\mu$ m.  
 (K) Mutant femoral bone marrow in an adult mouse that had spontaneously died with multiple vascular anomalies was hypocellular with increased density of vascular sinuses rather than adiposity. Bar, 200  $\mu$ m.

## New models of *Pik3ca*-related disorders

(L) Heart from a *Krox20-Cre*<sup>+/-</sup>; *Pik3ca*<sup>H1047R/+</sup>; *RdT*<sup>+/-</sup> mouse showing recombined cells in a fine meshwork throughout the myocardium of all chambers with increased density in the ventral pulmonary trunk and strong expression in the outer wall of a sympathetic nerve (arrow). Bar, 200  $\mu$ m.

(M) Typical histology of vascular lacunae in the ventricular wall. Bar, 200  $\mu$ m.

(N, O) Subcutaneous vascular tumor of tail. Bar, 2 mm.

(P) Dorsal aspect of lineage-traced mutant hairy skin. Fluorescence is visible at the base of each hair follicle and in the vascular pericytes of capillaries underlying them. Bar, 200  $\mu$ m.

(Q) Ventral aspect of lineage-traced mutant hairy skin. The *panniculus carnosus* muscle had expressed *Krox20* (striations) and the peripheral nerves express *Krox20Cre*-driven Tomato even more strongly in their myelinating Schwann cells. Bar, 0.5 mm.

(R) Vascular lacunae separate disrupt the organization of muscle bundles and their external connective tissues in a mutant thigh. Bar, 200  $\mu$ m.

(S) Disrupted vascular structures were also present in the mutant salivary gland.

(T) A profusion of small vascular sinuses were enlarged and necrosis was visible in the mutant liver. Bar = 100  $\mu$ m.

ao, aorta; la, left atrium; lv, left ventricle; pt, pulmonary trunk; ra, right atrium; rca, right coronary artery; rv, right ventricle, sa, septal artery.

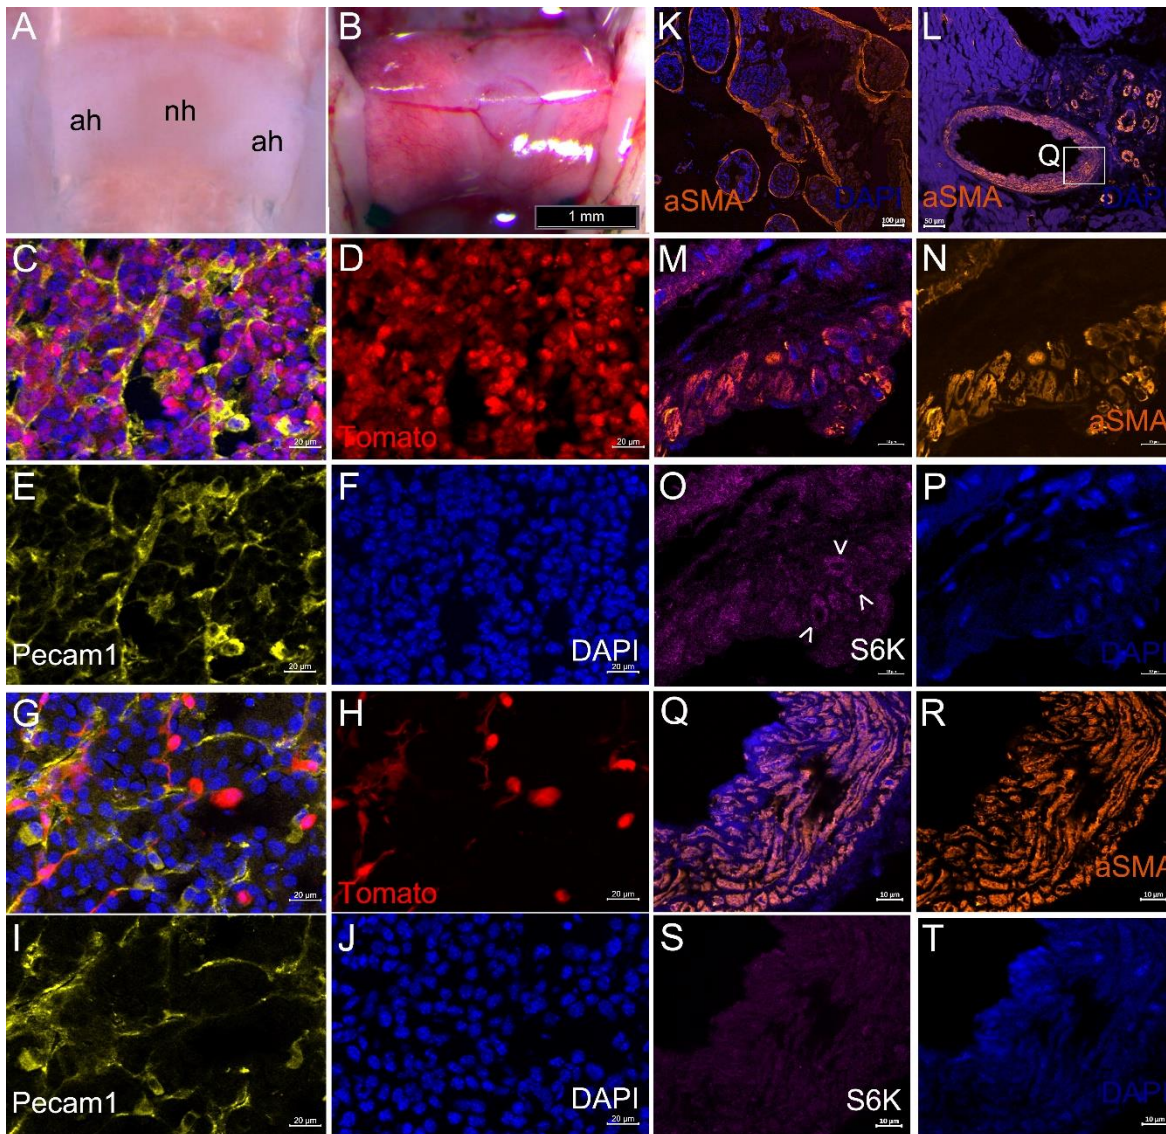

**Figure 6.** Lineage tracing and immunofluorescence in *Krox20-Cre<sup>+o</sup>; Pik3ca<sup>H1047R/+</sup>* adult mutant mice.

(A) Dorsal view of control pituitary after removal of brain and meninges.

(B) Dorsal view of *Krox20-Cre<sup>+o</sup>; RdT<sup>+o</sup>* pituitary during dissection after removal of brain, showing highly fluorescent adenohypophysis under visible light. Bar, 1 mm.

(C-F) Section through adenohypophysis of *Krox20-Cre<sup>+o</sup>; RdT<sup>+o</sup>* mouse, showing normal cell density and that most or all cell types, including perivascular nuclei, had expressed *Krox20*, unlike the sparse recombination observed in the neurohypophysis (not shown). (C) Merged (D) Tomato (E) Pecam1 (CD31) (F) DAPI fluorescence. Bar, 20  $\mu$ m.

(G-J) Section through adenohypophysis of *Krox20-Cre<sup>+o</sup>; Pik3ca<sup>H1047R/+</sup>; RdT<sup>+o</sup>* mouse, showing reduced cell density accompanied by a striking reduction in cells that had expressed *Krox20*. Bar, 20  $\mu$ m.

(K, L) Expression of alpha-smooth muscle actin (aSMA, orange) around vascular tumors (K) and in a coronary artery and surrounding telangiectasias (L). Area magnified in (Q) indicated.

(M-P) Mural structure in representative vascular anomaly. Slight increase of phosphorylated S6 kinase (O, purple, arrowheads) in a few among the disorganized and unusually shaped cells of the aSMA-expressing vascular wall (N, orange). (M) Merged. (P) DAPI. Bar = 10  $\mu$ m.

## New models of Pik3ca-related disorders

**(Q-T)** Mural structure of the coronary artery in (L). No apparent increase of phosphorylated S6 kinase (**S**, purple) but presence of disorganized and unusually shaped cells in the aSMA-expressing vascular wall (**R**, orange), although some laminar structure is still present. **(Q)** Merged. **(T)** DAPI. Bar = 10  $\mu$ m.

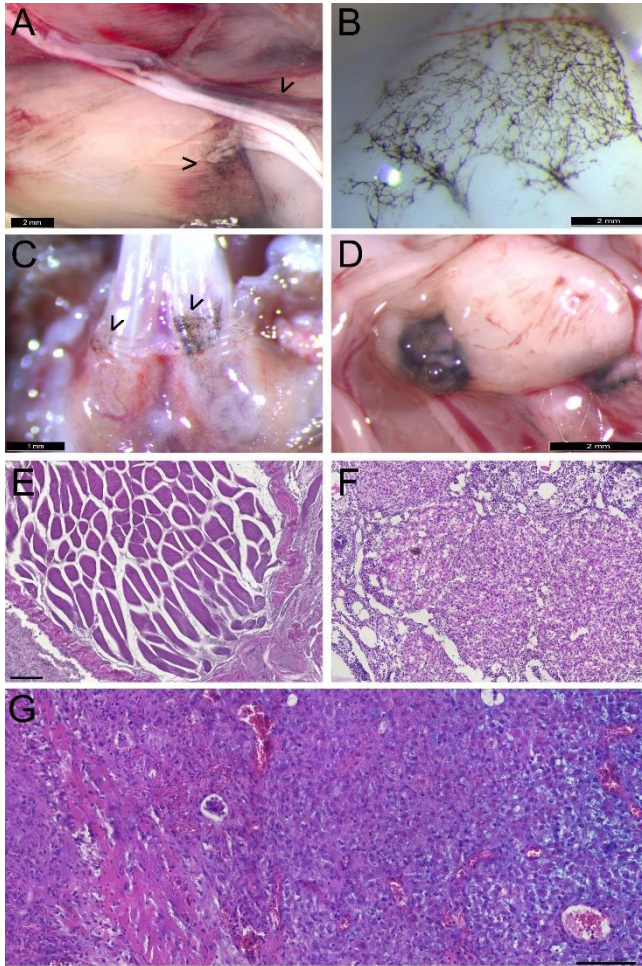

**Figure 7.** Widespread melanocytic anomalies in conjunction with *Krox20*- or *Sox10*-driven expression of constitutively active *Pik3ca*.

(A) Extracutaneous pigmented melanocyte deposits along nerves and muscle fascia in *Krox20-Cre*<sup>+/-</sup>; *Pik3ca*<sup>H1047R/+</sup> mice, close to vascular anomalies. Bar = 2 mm.

(B) Increased meningeal melanocytosis over ventromedial frontal lobes and olfactory bulbs in *Krox20-Cre*<sup>+/-</sup>; *Pik3ca*<sup>H1047R/+</sup> mutants, not seen in 4OH-TAM-treated *Sox10-Cre*<sup>+/-</sup>; *Pik3ca*<sup>H1047R/+</sup> mice. Bar = 2 mm.

(C) Pigmented, gingival melanocytosis over lower incisors of *Krox20-Cre*<sup>+/-</sup>; *Pik3ca*<sup>H1047R/+</sup> mutants, not seen in 4OH-TAM-treated *Sox10-Cre*<sup>+/-</sup>; *Pik3ca*<sup>H1047R/+</sup> mice. Bar = 1 mm.

(D) Melanoma in *Krox20-Cre*<sup>+/-</sup>; *Pik3ca*<sup>H1047R/+</sup> mutant mouse near seminal gland. Bar = 2 mm.

(E) Rhabdomyomatous mesenchymal hamartoma in thigh of *Krox20-Cre*<sup>+/-</sup>; *Pik3ca*<sup>H1047R/+</sup> mutant mouse. Bar = 100  $\mu$ m.

(F) Ovary of *Sox10-CreER*<sup>T2</sup>; *Pik3ca*<sup>H1047R/+</sup> mouse induced at 15 weeks with 1 mg 4OH-TAM, after 5 days.

(G) Unpigmented, myxoid melanoma in tail of induced *Sox10-CreER*<sup>T2</sup>; *Pik3ca*<sup>H1047R/+</sup> mouse, after nearly one year. Bar = 100  $\mu$ m.

## New models of Pik3ca-related disorders

### 6 Conflict of Interest

The authors declare that the research was conducted in the absence of any commercial or financial relationships that could be construed as a potential conflict of interest.

### 7 Author Contributions

EM, MM and ML planned and performed mouse crosses and dissections, and undertook the histology and immunofluorescence experiments as well as microscopy. AP and KH acquired and analyzed the data for Figure 2. GM and AB provided reagents and expertise on PI3K signaling. TF dissected pituitary glands and aided in the interpretation of the pituitary sections. NM reviewed the histology. HCE contributed the *in situ* hybridization and microscopy, supervised statistical analyses, obtained funding and wrote the manuscript. All authors reviewed the final manuscript.

### 8 Funding

A travel grant from CREST-NET to A.P. seeded this collaboration. Further funding for this work was provided by patient advocacy groups: Association Française contre les Myopathies (MoThARD project), the Association du Naevus Géant Congénital, Asociación Española de Nevus Gigante Congénito, the Association Naevus 2000 France-Europe and the Blackswan Foundation (RE(ACT) CMN).

### 9 Acknowledgments

The authors acknowledge all the members of the DIP-NET team for ensuring continuity under challenging circumstances. They also thank Adeline Ghata and the rest of the MMG animal platform for their precious assistance, and Dr. Lotfi Slimani for help generating the micro-CT data at the PIV core facility (<http://piv.parisdescartes.fr/>).

### 10 Contribution to the field statement

In this paper, my co-authors and I have developed multiple new mouse models to test the developmental function of a gene whose mutations are frequent and well known to cancer researchers, called *PIK3CA*. The H1047R mutation is present in 4 out of 10 common malignancies due to this gene, permanently activating the enzyme that it encodes and driving aggressive tumor growth. We have carefully observed and described the anatomical and molecular characteristics of many new malformations that can also be caused by the same oncogenic mutation. Mutations of *PIK3CA* have also been identified over the last decade in numerous rare disease syndromes with overlapping symptoms, among which musculoskeletal, brain and vascular malformations are regularly observed. By restricting *PIK3CA* activity to specific subsets of cells in the mouse, we have identified that their abilities to make or influence other cell types renders them more vulnerable to causing changes in tissue shape and size, or to developing cancer. These mouse models indicate additional candidate diseases in humans where *PIK3CA* may be locally active, opening new potential applications for existing treatments.

### 11 References

Adameyko, I., Lallemand, F., Aquino, J. B., Pereira, J. A., Topilko, P., Müller, T., et al. (2009).

- Schwann Cell Precursors from Nerve Innervation Are a Cellular Origin of Melanocytes in Skin. *Cell* 139, 366–379. doi:10.1016/j.cell.2009.07.049.
- Adams, J. R., Xu, K., Liu, J. C., Agamez, N. M. R., Loch, A. J., Wong, R. G., et al. (2011). Cooperation between Pik3ca and p53 Mutations in Mouse Mammary Tumor Formation. *Cancer Res.* 71, 2706–2717. doi:10.1158/0008-5472.CAN-10-0738.
- Alcantara, D., Timms, A. E., Gripp, K., Baker, L., Park, K., Collins, S., et al. (2017). Mutations of AKT3 are associated with a wide spectrum of developmental disorders including extreme megalencephaly. *Brain* 140, 2610–2622. doi:10.1093/brain/awx203.
- Avramović, V., Frederiksen, S. D., Brkić, M., and Tarailo-Graovac, M. (2021). Driving mosaicism: somatic variants in reference population databases and effect on variant interpretation in rare genetic disease. *Hum. Genomics* 15, 71. doi:10.1186/s40246-021-00371-y.
- Baggiolini, A., Callahan, S. J., Montal, E., Weiss, J. M., Trieu, T., Tagore, M. M., et al. (2021). Developmental chromatin programs determine oncogenic competence in melanoma. *Science* (80- ). 373. doi:10.1126/science.abc1048.
- Bergwerff, M., Verberne, M. E., DeRuiter, M. C., Poelmann, R. E., and Gittenberger-de Groot, A. C. (1998). Neural crest cell contribution to the developing circulatory system: implications for vascular morphology? *Circ. Res.* 82, 221–31. Available at: <http://www.ncbi.nlm.nih.gov/pubmed/9468193>.
- Bolande, R. P. (1974). The neurocristopathies: a unifying concept of disease arising in neural crest development. *Hum. Pathol.* 5, 409–429. Available at: <http://www.ncbi.nlm.nih.gov/pubmed/162896>.
- Canaud, G., Hammill, A. M., Adams, D., Vikkula, M., and Keppler-Noreuil, K. M. (2021). A review of mechanisms of disease across PIK3CA-related disorders with vascular manifestations. *Orphanet J. Rare Dis.* 16, 306. doi:10.1186/s13023-021-01929-8.
- Carroll, S. B. (2008). Evo-devo and an expanding evolutionary synthesis: a genetic theory of morphological evolution. *Cell* 134, 25–36. doi:10.1016/j.cell.2008.06.030.
- Castel, P., Carmona, F. J., Grego-Bessa, J., Berger, M. F., Viale, A., Anderson, K. V., et al. (2016). Somatic PIK3CA mutations as a driver of sporadic venous malformations. *Sci. Transl. Med.* 8, 332ra42. doi:10.1126/scitranslmed.aaf1164.
- Castillo, S. D., Tzouanacou, E., Zaw-Thin, M., Berenjano, I. M., Parker, V. E. R., Chivite, I., et al. (2016). Somatic activating mutations in Pik3ca cause sporadic venous malformations in mice and humans. *Sci. Transl. Med.* 8, 332ra43-332ra43. doi:10.1126/scitranslmed.aad9982.
- Ciarlo, C., Kaufman, C. K., Kinikoglu, B., Michael, J., Yang, S., D’Amato, C., et al. (2017). A chemical screen in zebrafish embryonic cells establishes that Akt activation is required for neural crest development. *Elife* 6, 1–26. doi:10.7554/eLife.29145.
- Couto, J. A., Konczyk, D. J., Vivero, M. P., Kozakewich, H. P. W., Upton, J., Fu, X., et al. (2017). Somatic PIK3CA mutations are present in multiple tissues of facial infiltrating lipomatosis. *Pediatr. Res.* 82, 850–854. doi:10.1038/pr.2017.155.



## New models of Pik3ca-related disorders

- Danielian, P. S., Muccino, D., Rowitch, D. H., Michael, S. K., and McMahon, A. P. (1998). Modification of gene activity in mouse embryos in utero by a tamoxifen-inducible form of Cre recombinase. *Curr. Biol.* 8, 1323–6. Available at: <http://www.ncbi.nlm.nih.gov/pubmed/9843687>.
- Deal, K. K., Rosebrock, J. C., Eeds, A. M., DeKeyser, J. M. L., Musser, M. A., Ireland, S. J., et al. (2021). Sox10-cre BAC transgenes reveal temporal restriction of mesenchymal cranial neural crest and identify glandular Sox10 expression. *Dev. Biol.* 471, 119–137. doi:10.1016/j.ydbio.2020.12.006.
- Decker, L., Desmarquet-Trin-Dinh, C., Taillebourg, E., Ghislain, J., Vallat, J.-M., and Charnay, P. (2006). Peripheral myelin maintenance is a dynamic process requiring constant Krox20 expression. *J. Neurosci.* 26, 9771–9. doi:10.1523/JNEUROSCI.0716-06.2006.
- Dill, P. E., De Bernardis, G., Weber, P., and L??sch, U. (2014). Topical everolimus for facial angiofibromas in the tuberous sclerosis complex. A first case report. *Pediatr. Neurol.* 51, 109–113. doi:10.1016/j.pediatrneurol.2014.02.016.
- Ding, H., Wu, X., Bostrom, H., Kim, I., Wong, N., Tsoi, B., et al. (2004). A specific requirement for PDGF-C in palate formation and PDGFR-alpha signaling. *Nat Genet* 36, 1111–1116.
- Echelard, Y., Vassileva, G., and McMahon, A. P. (1994). Cis-acting regulatory sequences governing Wnt-1 expression in the developing mouse CNS. *Development* 120, 2213–24. Available at: <http://www.ncbi.nlm.nih.gov/pubmed/7925022> [Accessed April 14, 2011].
- Etchevers, H. C., Dupin, E., and Le Douarin, N. M. (2019). The diverse neural crest: from embryology to human pathology. *Development* 146, 0–3. doi:10.1242/dev.169821.
- Etchevers, H. C., Vincent, C., Le Douarin, N. M., and Couly, G. F. (2001). The cephalic neural crest provides pericytes and smooth muscle cells to all blood vessels of the face and forebrain. *Development* 128, 1059–68. Available at: <http://www.ncbi.nlm.nih.gov/pubmed/11245571> [Accessed December 22, 2010].
- Etchevers, H., Couly, G., Vincent, C., and Le Douarin, N. M. (1999). Anterior cephalic neural crest is required for forebrain viability. *Development* 126, 3533–3543. Available at: [http://www.ncbi.nlm.nih.gov/entrez/query.fcgi?cmd=Retrieve&db=PubMed&dopt=Citation&list\\_uids=10409500](http://www.ncbi.nlm.nih.gov/entrez/query.fcgi?cmd=Retrieve&db=PubMed&dopt=Citation&list_uids=10409500).
- Frisk, S., Taylan, F., Blaszczyk, I., Nennesmo, I., Annerén, G., Herm, B., et al. (2019). Early activating somatic PIK3CA mutations promote ectopic muscle development and upper limb overgrowth. *Clin. Genet.* 96, 118–125. doi:10.1111/cge.13543.
- Gresset, A., Couplier, F., Gerschenfeld, G., Jourdon, A., Matesic, G., Richard, L., et al. (2015). Boundary Caps Give Rise to Neurogenic Stem Cells and Terminal Glia in the Skin. *Stem Cell Reports* 5, 278–290. doi:10.1016/j.stemcr.2015.06.005.
- Gudjohnsen, S. A. H., Atacho, D. A. M., Gesbert, F., Raposo, G., Hurbain, I., Larue, L., et al. (2015). Meningeal Melanocytes in the Mouse: Distribution and Dependence on Mitf. *Front. Neuroanat.* 9, 149. doi:10.3389/fnana.2015.00149.

- He, F., and Soriano, P. (2013). A Critical Role for PDGFR $\alpha$  Signaling in Medial Nasal Process Development. *PLoS Genet.* 9. doi:10.1371/journal.pgen.1003851.
- Ho, A. C. C., Liu, A. P. Y., Lun, K. S., Tang, W. F., Chan, K. Y. K., Lau, E. Y. T., et al. (2012). European Journal of Medical Genetics A newborn with a 790 kb chromosome 17p13 . 3 microduplication presenting with aortic stenosis , microcephaly and dysmorphic facial features e Is cardiac assessment necessary for all patients with 17p13 . 3 microduplica. *Eur. J. Med. Genet.* 55, 758–762. doi:10.1016/j.ejmg.2012.09.011.
- Hong, T., Xiao, X., Ren, J., Cui, B., Zong, Y., Zou, J., et al. (2021). Somatic MAP3K3 and PIK3CA mutations in sporadic cerebral and spinal cord cavernous malformations. *Brain* 144, 2648–2658. doi:10.1093/brain/awab117.
- Hori, Y., Hirose, K., Aramaki-Hattori, N., Suzuki, S., Nakayama, R., Inoue, M., et al. (2020). Fibro-adipose vascular anomaly (FAVA): three case reports with an emphasis on the mammalian target of rapamycin (mTOR) pathway. *Diagn. Pathol.* 15, 98. doi:10.1186/s13000-020-01004-z.
- Jiang, X., Iseki, S., Maxson, R. E., Sucov, H. M., and Morriss-Kay, G. M. (2002). Tissue origins and interactions in the mammalian skull vault. *Dev. Biol.* 241, 106–16. doi:10.1006/dbio.2001.0487.
- Kaucka, M., Ivashkin, E., Gyllborg, D., Zikmund, T., Tesarova, M., Kaiser, J., et al. (2016). Analysis of neural crest-derived clones reveals novel aspects of facial development. *Sci. Adv.* 2, e1600060–e1600060. doi:10.1126/sciadv.1600060.
- Kaucka, M., Szarowska, B., Kavkova, M., Kastriti, M. E., Kameneva, P., Schmidt, I., et al. (2021). Nerve-associated Schwann cell precursors contribute extracutaneous melanocytes to the heart, inner ear, supraorbital locations and brain meninges. *Cell. Mol. Life Sci.* 78, 6033–6049. doi:10.1007/s00018-021-03885-9.
- Keppler-Noreuil, K. M., Sapp, J. C., Lindhurst, M. J., Parker, V. E. R., Blumhorst, C., Darling, T., et al. (2014). Clinical delineation and natural history of the PIK3CA-related overgrowth spectrum. *Am. J. Med. Genet.* 164, 1713–33. doi:10.1002/ajmg.a.36552.
- Kingsmore, S., Smith, L., Soden, S., Dinwiddie, D., Saunders, C., Farrow, E., et al. (2013). Exome Sequencing Reveals De Novo Germline Mutation of the Mammalian Target of Rapamycin (MTOR) in a Patient with Megalencephaly and Intractable Seizures. *J. Genomes Exomes*, 63. doi:10.4137/JGE.S12583.
- Kobialka, P., Sabata, H., Vilalta, O., Gouveia, L., Angulo-Urarte, A., Muixí, L., et al. (2022). The onset of PI3K-related vascular malformations occurs during angiogenesis and is prevented by the AKT inhibitor miransertib. *EMBO Mol. Med.* doi:10.15252/emmm.202115619.
- Krings, T., Geibprasert, S., Luo, C. B., Bhattacharya, J. J., Alvarez, H., and Lasjaunias, P. (2007). Segmental neurovascular syndromes in children. *Neuroimaging Clin. N. Am.* 17, 245–58. doi:10.1016/j.nic.2007.02.006.
- Kurek, K. C., Howard, E., Tennant, L. B., Upton, J., Alomari, A. I., Burrows, P. E., et al. (2012). PTEN hamartoma of soft tissue: a distinctive lesion in PTEN syndromes. *Am. J. Surg. Pathol.* 36, 671–87. doi:10.1097/PAS.0b013e31824dd86c.

## New models of Pik3ca-related disorders

- Le Douarin, N., and Kalcheim, C. (1999). *The Neural Crest*. 2nd ed. Cambridge, U.K.: Cambridge University Press.
- Le Lievre, C. S., and Le Douarin, N. M. (1975). Mesenchymal derivatives of the neural crest: analysis of chimaeric quail and chick embryos. *J. Embryol. Exp. Morphol.* 34, 125–154.
- Lee, J. H., Huynh, M., Silhavy, J. L., Kim, S., Dixon-Salazar, T., Heiberg, A., et al. (2012). De novo somatic mutations in components of the PI3K-AKT3-mTOR pathway cause hemimegalencephaly. *Nat. Genet.* 44, 941–945. doi:10.1038/ng.2329.
- Lian, C. G., Sholl, L. M., Zakka, L. R., O, T. M., Liu, C., Xu, S., et al. (2014). Novel Genetic Mutations in a Sporadic Port-Wine Stain. *JAMA Dermatology* 150, 1336. doi:10.1001/jamadermatol.2014.1244.
- Limaye, N., Kangas, J., Mendola, A., Godfraind, C., Schlögel, M. J., Helaers, R., et al. (2015). Somatic Activating PIK3CA Mutations Cause Venous Malformation. *Am. J. Hum. Genet.* 97, 914–921. doi:10.1016/j.ajhg.2015.11.011.
- Luks, V. L., Kamitaki, N., Vivero, M. P., Uller, W., Rab, R., Bovée, J. V. M. G., et al. (2015). Lymphatic and Other Vascular Malformative/Overgrowth Disorders Are Caused by Somatic Mutations in PIK3CA. *J. Pediatr.* 166, 1048-1054.e5. doi:10.1016/j.jpeds.2014.12.069.
- Madisen, L., Zwingman, T. A., Sunkin, S. M., Oh, S. W., Zariwala, H. A., Gu, H., et al. (2010). A robust and high-throughput Cre reporting and characterization system for the whole mouse brain. *Nat. Neurosci.* 13, 133–40. doi:10.1038/nn.2467.
- Marek, T., Mahan, M. A., Carter, J. M., Howe, B. M., Bartos, R., Amrami, K. K., et al. (2021). What’s known and what’s new in adipose lesions of peripheral nerves? *Acta Neurochir. (Wien)*. 163, 835–842. doi:10.1007/s00701-020-04620-2.
- Maro, G. S., Vermeren, M., Voiculescu, O., Melton, L., Cohen, J., Charnay, P., et al. (2004). Neural crest boundary cap cells constitute a source of neuronal and glial cells of the PNS. *Nat. Neurosci.* 7, 930–8. doi:10.1038/nn1299.
- Mendiratta, G., Ke, E., Aziz, M., Liarakos, D., Tong, M., and Stites, E. C. (2021). Cancer gene mutation frequencies for the U.S. population. *Nat. Commun.* 12, 5961. doi:10.1038/s41467-021-26213-y.
- Muhl, L., Genové, G., Leptidis, S., Liu, J., He, L., Mocci, G., et al. (2020). Single-cell analysis uncovers fibroblast heterogeneity and criteria for fibroblast and mural cell identification and discrimination. *Nat. Commun.* 11, 1–18. doi:10.1038/s41467-020-17740-1.
- Müller, S. M., Stolt, C. C., Terszowski, G., Blum, C., Amagai, T., Kessaris, N., et al. (2008). Neural crest origin of perivascular mesenchyme in the adult thymus. *J. Immunol.* 180, 5344–51. doi:10.4049/jimmunol.180.8.5344.
- Noden, D. M., and Trainor, P. A. (2005). Relations and interactions between cranial mesoderm and neural crest populations. *J. Anat.* 207, 575–601. doi:10.1111/j.1469-7580.2005.00473.x.
- Odelin, G., Faure, E., Couplier, F., Di Bonito, M., Bajolle, F., Studer, M., et al. (2018). Krox20

- defines a subpopulation of cardiac neural crest cells contributing to arterial valves and bicuspid aortic valve. *Development* 145, dev151944. doi:10.1242/dev.151944.
- Ola, R., Dubrac, A., Han, J., Zhang, F., Fang, J. S., Larrivé, B., et al. (2016). PI3 kinase inhibition improves vascular malformations in mouse models of hereditary haemorrhagic telangiectasia. *Nat. Commun.* 7, 13650. doi:10.1038/ncomms13650.
- Orr-Urtreger, A., Bedford, M. T., Do, M. S., Eisenbach, L., and Lonai, P. (1992). Developmental expression of the  $\alpha$  receptor for platelet-derived growth factor, which is deleted in the embryonic lethal Patch mutation. *Development* 115, 289–303. doi:10.1242/dev.115.1.289.
- Pilatti, P., and Astúa, D. (2017). Orbit orientation in didelphid marsupials (Didelphimorphia: Didelphidae). *Curr. Zool.* 63, 403–415. doi:10.1093/cz/zow068.
- Ren, A. A., Snellings, D. A., Su, Y. S., Hong, C. C., Castro, M., Tang, A. T., et al. (2021). PIK3CA and CCM mutations fuel cavernomas through a cancer-like mechanism. *Nature* 594, 271–276. doi:10.1038/s41586-021-03562-8.
- Roy, A., Skibo, J., Kalume, F., Ni, J., Rankin, S., Lu, Y., et al. (2015). Mouse models of human PIK3CA-related brain overgrowth have acutely treatable epilepsy. *Elife* 4, 1–25. doi:10.7554/eLife.12703.
- Sauer, B. (1998). Inducible gene targeting in mice using the Cre/lox system. *Methods A Companion to Methods Enzymol.* 14, 381–392. doi:10.1006/meth.1998.0593.
- Segrelles, C., Moral, M., Lorz, C., Santos, M., Lu, J., Cascallana, J. L., et al. (2008). Constitutively active Akt induces ectodermal defects and impaired bone morphogenetic protein signaling. *Mol. Biol. Cell* 19, 137–49. doi:10.1091/mbc.e07-08-0764.
- Shirley, M. D., Tang, H., Gallione, C. J., Baugher, J. D., Frelin, L. P., Cohen, B., et al. (2013). Sturge-Weber syndrome and port-wine stains caused by somatic mutation in GNAQ (SI). *N. Engl. J. Med.* 368, 1971–9. doi:10.1056/NEJMoa1213507.
- Sittewelle, M., and Monsoro-Burq, A. H. (2018). AKT signaling displays multifaceted functions in neural crest development. *Dev. Biol.* 444, S144–S155. doi:10.1016/j.ydbio.2018.05.023.
- Tabler, J. M., Rice, C. P., Liu, K. J., and Wallingford, J. B. (2016). A novel ciliopathic skull defect arising from excess neural crest. *Dev. Biol.* 417, 4–10. doi:10.1016/j.ydbio.2016.07.001.
- Tachibana, N., Touahri, Y., Dixit, R., David, L. A., Adnani, L., Cantrup, R., et al. (2018). Hamartoma-like lesions in the mouse retina: an animal model of Pten hamartoma tumour syndrome. *Dis. Model. Mech.* 11, dmm031005. doi:10.1242/dmm.031005.
- Tallquist, M. D., and Soriano, P. (2003). Cell autonomous requirement for PDGFRalpha in populations of cranial and cardiac neural crest cells. *Development* 130, 507–518. doi:10.1242/dev.00241.
- Tan, W.-H., Baris, H. N., Burrows, P. E., Robson, C. D., Alomari, A. I., Mulliken, J. B., et al. (2007). The spectrum of vascular anomalies in patients with PTEN mutations: implications for diagnosis and management. *J. Med. Genet.* 44, 594–602. doi:10.1136/jmg.2007.048934.

## New models of Pik3ca-related disorders

Tate, J. G., Bamford, S., Jubb, H. C., Sondka, Z., Beare, D. M., Bindal, N., et al. (2019). COSMIC: the Catalogue Of Somatic Mutations In Cancer. *Nucleic Acids Res.* 47, D941–D947. doi:10.1093/nar/gky1015.

Thomas, A. C., Heux, P., Santos, C., Arulvasan, W., Solanky, N., Carey, M. E., et al. (2018). Widespread dynamic and pleiotropic expression of the melanocortin-1-receptor (MC1R) system is conserved across chick, mouse and human embryonic development. *Birth Defects Res.* 110, 443–455. doi:10.1002/bdr2.1183.

Topilko, P. (2019). Neural crest derived boundary cap cells: A source of pericytes to the developing peripheral vasculature. *Morphologie* 103, 71–72. doi:10.1016/j.morpho.2019.10.007.

Venot, Q., Blanc, T., Rabia, S. H., Berteloot, L., Ladraa, S., Duong, J. P., et al. (2018). Targeted therapy in patients with PIK3CA-related overgrowth syndrome. *Nature* 558, 540–546. doi:10.1038/s41586-018-0217-9.

Voiculescu, O., Charnay, P., and Schneider-Maunoury, S. (2000). Expression pattern of a Krox-20/Cre knock-in allele in the developing hindbrain, bones, and peripheral nervous system. *Genesis* 26, 123–126. doi:10.1002/(SICI)1526-968X(200002)26:2<123::AID-GENE7>3.0.CO;2-O.

Zachariah, M. A., and Cyster, J. G. (2010). Neural Crest-Derived Pericytes Promote Egress of Mature Thymocytes at the Corticomedullary Junction. *Science (80-. )*. 328, 1129–1135. doi:10.1126/science.1188222.
